# 1 **Multi-region proteome analysis quantifies spatial heterogeneity of** 2 **prostate tissue biomarkers**

3  
4 Tiannan Guo<sup>1,7,8\*</sup>, Li Li<sup>2\*</sup>, Qing Zhong<sup>3,10\*</sup>, Niels J. Rupp<sup>3</sup>, Konstantina Charmpi<sup>2</sup>, Christine E. Wong<sup>3</sup>,  
5 Ulrich Wagner<sup>3</sup>, Jan H. Rueschoff<sup>3</sup>, Wolfram Jochum<sup>4</sup>, Christian Fankhauser<sup>5</sup>, Karim Saba<sup>5</sup>, Cedric  
6 Poyet<sup>5</sup>, Peter J. Wild<sup>3, 11, #</sup>, Ruedi Aebersold<sup>1,6, #</sup>, Andreas Beyer<sup>2,9, #</sup>

7  
8 <sup>1</sup>Department of Biology, Institute of Molecular Systems Biology, ETH, Zurich, Switzerland

9 <sup>2</sup>CECAD, University of Cologne, Cologne, Germany

10 <sup>3</sup>Department of Pathology and Molecular Pathology, University Hospital Zurich, Zurich, Switzerland

11 <sup>4</sup>Institute of Pathology, Cantonal Hospital St. Gallen, St. Gallen, Switzerland

12 <sup>5</sup>Department of Urology, University Hospital Zurich, Zurich, Switzerland

13 <sup>6</sup>Faculty of Science, University of Zurich, Zurich, Switzerland

14 <sup>7</sup>Institute of Basic Medical Sciences, Westlake Institute for Advanced Study, Hangzhou, Zhejiang, China

15 <sup>8</sup>Westlake University, Hangzhou, Hangzhou, Zhejiang, China

16 <sup>9</sup>Center for Molecular Medicine Cologne (CMMC), University of Cologne, Cologne, Germany.

17 <sup>10</sup>Cancer Data Science Group, Children's Medical Research Institute, University of Sydney, Sydney, New  
18 South Wales, Australia.

19 <sup>11</sup>Institute of Pathology, University Hospital Frankfurt, Frankfurt am Main, Germany

20 \* Equal contribution

21 # Corresponding authors

22

## 23 **Email contacts for corresponding authors:**

24 Peter J. Wild: Peter.Wild@usz.ch

25 Ruedi Aebersold: aebersold@imsb.biol.ethz.ch

26 Andreas Beyer: andreas.beyer@uni-koeln.de

27

28

29 **Abstract**

30 Many tumors are characterized by large genomic heterogeneity and it remains unclear to what extent this  
31 impacts on protein biomarker discovery. Here, we quantified proteome intra-tissue heterogeneity (ITH)  
32 based on a multi-region analysis of 30 biopsy-scale prostate tissues using pressure cycling technology and  
33 SWATH mass spectrometry. We quantified 8,248 proteins and analyzed the ITH of 3,700 proteins. The  
34 level of ITH varied significantly depending on proteins and tissue types. Benign tissues exhibited  
35 generally more complex ITH patterns than malignant tissues. Spatial variability of ten prostate biomarkers  
36 was further validated by immunohistochemistry in an independent cohort (n=83) using tissue microarrays.  
37 PSA was preferentially variable in benign prostatic hyperplasia, while GDF15 substantially varied in  
38 prostate adenocarcinomas. Further, we found that DNA repair pathways exhibited a high degree of  
39 variability in tumorous tissues, which may contribute to the genetic heterogeneity of tumors. This study  
40 conceptually adds a new perspective to protein biomarker discovery by quantifying spatial proteome  
41 variation and it demonstrates the feasibility by exploiting recent technological progress.

## 42 Introduction

43 During the last decade numerous new cancer treatment options have been developed. Their  
44 optimal application, however, requires better molecular characterization of the tumors with the aim of  
45 developing biomarkers matching the specific tumor to the best available therapy. Some cancer types, such  
46 as prostate cancer, still suffer from an ‘over treatment problem’, *i.e.* radical therapy such as removal of  
47 the organ in unnecessary cases due to uncertain diagnosis. These problems persist despite the recent  
48 progress in genomic, transcriptomic, and proteomic profiling of tumors. In contrast to the standardization  
49 of histopathological diagnostic categories, tumor grading, and standards of reporting, molecular testing is  
50 still underexploited in routine diagnostics of localized prostate cancer cases. A recent review about  
51 biomarkers in prostate cancer (Kristiansen, 2018) has highlighted the need to consider intra-tissue  
52 heterogeneity (ITH) in each individual case for successful molecular testing. ITH is of high clinical  
53 relevance. For instance, a tumor may contain a small sub-population of cells with primary resistance,  
54 leading to incomplete response to treatment or early recurrence (Murtaza, Dawson et al., 2015). High  
55 degree of Gleason score, DNA ploidy, and PTEN expression have been observed in prostate tumors (Cyll,  
56 Ersvaer et al., 2017). Thus, it remains a challenge to optimize clinical decisions based on single biopsies  
57 (Boutros, Fraser et al., 2015).

58 Indeed, ITH is an important contributor to spatially variable molecular levels, which poses a  
59 substantial problem for biopsy-based tumor diagnostics, because for highly variable proteins, the  
60 measured quantity is position-dependent. Genomic ITH has been predicted based on clonal evolution and  
61 the cancer stem cell hypothesis (Dalerba, Cho et al., 2007). This prediction was experimentally validated  
62 by the application of high-throughput sequencing to small tissue samples and even single cells. Such  
63 studies have uncovered a high degree of genetic ITH in colon (Jones, Chen et al., 2008), pancreas  
64 (Yachida, Jones et al., 2010), breast (Russnes, Navin et al., 2011), prostate (Haffner, Mosbrugger et al.,  
65 2013), renal carcinomas (Gerlinger, Rowan et al., 2012), and leukemia (Cancer Genome Atlas Research,  
66 2013, Ding, Ley et al., 2012), with regard to both mutational and gene expression profiles of tumor cells.  
67 For example, Boutros *et al.* observed extensive ITH in prostate cancers at the level of gene copy number  
68 alterations and point mutations, which led to spatially divergent mutational patterns for thousands of  
69 genes, including several tumor-relevant genes (Boutros et al., 2015). It can be expected that genomic ITH  
70 will be translated, at least to some extent, to ITH at the protein level. For example, androgen receptor and  
71 prostate specific antigen (PSA/KLK3) expression can significantly vary between different regions within  
72 the same prostate carcinoma (Magi-Galluzzi, Xu et al., 1997, Shah, Bentley et al., 2015). Thus, there is a  
73 need to systematically describe and quantify protein level heterogeneity in tumor tissues.

74 Despite this well recognized need, technical challenges have so far prevented the quantification of  
75 protein level heterogeneity in tumor specimens at the proteomic scale (Alizadeh, Aranda et al., 2015).

76 High-throughput antibody-based immunohistochemistry staining has been applied to tissue sections  
77 (Uhlen, Fagerberg et al., 2015). However, such data are semi-quantitative and limited in scope by the  
78 availability of suitable antibodies. Label-free shotgun proteomics has been used to explore in-depth the  
79 proteome of multiple regions of tumor tissues (Wisniewski, Ostasiewicz et al., 2012). However, due to  
80 the inherent technical limitations, the method is not suitable to systematically explore ITH at high sample-  
81 throughput and high spatial resolution, which is essential to achieve adequate spatial resolution (Domon  
82 & Aebersold, 2010). Single-cell proteomics using mass cytometry is another promising technology  
83 allowing quantification of protein levels in thousands of individual cells. However, the technique at  
84 present only measures 10s of proteins per sample (Giesen, Wang et al., 2014).

85 We have recently developed a mass spectrometry-based proteomics method, *i.e.* pressure cycling  
86 technology and sequential windowed acquisition of all theoretical fragment ion mass spectra (PCT-  
87 SWATH)(Guo, Kouvonen et al., 2015b), which supports highly reproducible and accurate quantification  
88 of a few thousand proteins from biopsy-scale tissue samples at high throughput. This is accomplished by  
89 the integration into a single platform of optimized sample preparation, mass spectrometric and  
90 computational elements. To generate mass spectrometry-ready peptide samples from tissue samples we  
91 adopted PCT to lyse the tissues, extract proteins and digest them into peptides in a single tube under  
92 precisely controlled conditions (Powell, Lazarev et al., 2012). To analyze the resulting peptide samples,  
93 we used SWATH-MS, a massively parallel targeting mass spectrometry method (Gillet, Navarro et al.,  
94 2012). In SWATH-MS all MS-measurable peptides in a sample are fragmented and periodically recorded  
95 over a single dimension of relatively short chromatography (Gillet et al., 2012). The net result of this  
96 technique is a single digital file that contains fragment ions of all mass spectrometry-detectable peptides,  
97 from which peptides and proteins are identified and quantified post acquisition, via a targeted data  
98 analysis strategy (Gillet et al., 2012, Röst, Rosenberger et al., 2014).

99 In this study, we approached proteomic ITH for prostate cancer tissues by PCT-SWATH-based  
100 multi-region proteomic analysis of 60 biopsy-level tissue samples from three prostate cancer patients. We  
101 then computed the technical and spatial biological variation for each measured protein in different types  
102 of tissues and different patients, and established a proteome-scale landscape of protein ITH in benign and  
103 malignant prostate tissues. Our data revealed distinct ITH patterns of prostate cancer biomarkers that were  
104 further independently validated using immunohistochemistry (IHC) in an independent set of 83 patients.

105

## 106 RESULTS

107

### 108 Study design for quantifying proteomic variability

109 We designed a study to quantify spatial proteomic variability in multiple regions of malignant and  
110 matching benign prostate tissues using the PCT-SWATH-MS platform (Guo, Kouvonen et al., 2015a).

111 We assumed that the total proteomic variability observed in the sample cohort was composed of technical  
112 and biological variation, the latter including inter-patient, inter-tissue and intra-tissue variation. To open

113 the possibility to partition the overall observed variability into its possible sources, we obtained tissue

114 samples from multiple regions of prostatectomy specimens as illustrated in **Figure 1**. Each sample was a  
115 tissue punch biopsy consisting of a cylinder of 1 mm diameter and about 3 mm length that was derived

116 from fresh frozen tissue blocks using a core needle. Samples were obtained from prostatectomy

117 specimens in three individuals diagnosed with adenocarcinoma (ADCA) of the prostate. Gleason grading  
118 was performed according to the International Society of Urological Pathology and the World Health

119 Organization consensus (Epstein, Egevad et al., 2016, Humphrey, Moch et al., 2016) (**Supplementary**

120 **Fig. 1**). In total, 12 benign prostatic hyperplasia (BPH) and 18 ADAC tissue samples were obtained. One

121 of the three individuals had a mixed acinar and ductal ADAC, and both subtypes were included in the

122 study to measure the variation resulting from morphologically distinct subtypes. The other two patient

123 samples displayed acinar ADCA by histologic means. Each tissue type (malignant *versus* benign) of each

124 patient was sampled three to six times resulting in a total of 30 biological samples. Each sample was

125 processed by PCT-SWATH in duplicate to evaluate the technical variation of the proteomic analysis (**Fig.**

126 **1, Supplementary Table 1**). The samples were grouped into 10 batches of six samples, according to

127 patient identity, tissue type and technical replicate (**Fig. 1A, Supplementary Table 2**). This experimental

128 design allowed us to subsequently estimate intra-tissue variability from within-batch comparisons (see

129 **Methods**), which is important to avoid overestimating variances due to batch effects.

130

### 131 Quantitative proteomic analysis of 30 prostate cancer tissue regions

132 The 10 batches of samples were processed using PCT-SWATH in duplicate over a period of 15

133 working days. The acquired SWATH-MS data were subjected to *in silico* targeted analysis using the

134 OpenSWATH software (Röst et al., 2014). In total, 39,493 proteotypic peptides and 8,248 protein groups

135 were quantified consistently across all 60 measurements (**Supplementary Table 3 and 4**). The measured

136 protein intensities were highly reproducible (average Pearson correlation values between replicates:

137 0.944). To obtain high-confidence estimates of ITH, we subsequently narrowed our statistical variation

138 analyses to a subset of 3,700 proteins quantified by at least two concordant proteotypic peptides. Our

139 peptide selection procedure ensured that the selected peptides showed consistent behavior across samples.

140 Thereby, we minimized the possibility that peptide intensity variation was not due to protein abundance  
141 changes, but due to post-translational modifications or other artifacts (see **Methods**) (Picotti, Clement-  
142 Ziza et al., 2013). We then corrected batch effects in the dataset by subtracting the average signal of each  
143 protein per batch. After batch correction, most technical replicates grouped together by unsupervised  
144 clustering based on the abundance of all proteins (**Supplementary Fig. 2**).

145

### 146 **Quantification of spatial proteomic heterogeneity**

147 Our estimates of proteomic ITH are based on the notion that the signal variation between two  
148 samples is due to a combination of biological and technical factors. Since the biological variation is not  
149 directly quantifiable, we estimated biological variance by subtracting the technical variance from the total  
150 observed punch-to-punch variance.

151 The technical variance was estimated by calculating the dispersion between two technical  
152 replicates for each sample (independent protein digests from the same punch measured separately), *i.e.*  
153 generating 30 initial technical variance estimates per protein before averaging them (see **Methods** for  
154 details). This strategy produced seven technical variance estimates for all pairs of patient / tissue type  
155 (three normal tissue regions, three acinar tissue regions, and one ductal tissue region, **Fig. 1**). Pairwise  
156 correlations of these seven independent estimates showed that technical variances were consistently  
157 positively correlated, with a median correlation of 0.572 (**Fig. 2A**). Likewise, we analyzed the same type  
158 of correlation for the total punch variances. Like the technical variance, independent estimates of the total  
159 variance were also highly correlated, albeit with a slightly lower median correlation of 0.302, suggesting  
160 that the technical variance was more robust and less dependent on the specific sample than the total  
161 variance and the biological variance (**Fig. 2B**). Thus, as expected, the technical variance of a protein was  
162 mostly determined by its physico-chemical properties, whereas total variance varied in different tissue  
163 samples probably due to biological factors. Further, technical variance of log-transformed intensities was  
164 independent of the mean log-intensity (**Supplementary Fig. 3**), suggesting that the same estimate of  
165 technical variance could be used at high and low protein concentrations. Subsequently, we averaged the  
166 seven estimates of technical variance per protein to obtain a single, robust estimate of each protein's  
167 technical variance.

168 Having established that our estimates of total variances and technical variances are robust, we  
169 next computed biological variances by subtracting each protein's technical variance from its total  
170 variance between punches of the same patient and tissue type (see **Methods**). This yielded an estimate of  
171 intra-tissue biological variances of protein abundance which can be interpreted as the degree of proteomic  
172 ITH. The technical and total variances were independently estimated, which makes it numerically  
173 possible that the technical variance can be larger than the total variance of a specific set of punches.

174 Indeed, for 183 proteins (4.9%) the estimated technical variance was larger than the total variance  
175 (**Supplementary Fig. 4**). These were mostly the proteins with very low total variance. We could not  
176 rigorously quantify the biological variances of these proteins, nevertheless, we assumed that most of them  
177 would have comparably low biological variances. Proteins with technical variances higher than total  
178 variances were excluded from most subsequent analyses.

179 Next, we compared the biological variances within a tissue with the biological variance between  
180 tissue types (benign versus malignant; termed *inter-tissue*) and between patients (**Fig. 3**). Inter-tissue and  
181 inter-patient variances were obtained by first averaging protein intensities from punches of the same  
182 tissue or patient, respectively (see **Fig. 1A** and **Methods**). Our data showed that the biological variance  
183 between punches within the same tissue (*i.e.* intra-tissue variance) is of similar magnitude as the variation  
184 of average intensities between tissues and patients, indicating a high degree of protein ITH (**Fig. 3A**).  
185 Further, the protein variances between patients, tissue, and within tissue were significantly correlated  
186 (**Fig. 3B-D**). Thus, a protein with large intra-tissue variation is also likely to vary across tissues and  
187 between the three patients.

188

### 189 **Classification of proteins based on their intra-tissue variability**

190 To characterize ITH in different tissue types, we compared the biological variance of each protein  
191 in benign and malignant prostate tissues, and quantified the variability of 3,517 proteins in BPH and  
192 ADCA tissue samples (**Supplementary Table 5**). Interestingly, we observed a strong dependence of the  
193 variability of some proteins on the tissue type. We then classified the thus quantified proteins into five  
194 groups based on their biological variance patterns in the different sample types (**Fig. 4A**). Group no. 1  
195 consisted of 100 proteins that were always robust and generally showed little intra-tissue variation in  
196 benign and malignant prostate tissues. Group no. 2 consisted of 339 proteins that varied substantially  
197 more in benign tissues compared to malignant tissues. Group no. 3 consisted of 93 proteins that varied  
198 more strongly in malignant tissues compared to benign tissues. Group no. 4 contained 365 proteins that  
199 had high intra-tissue variance in both malignant and benign tissues, while group no. 5 contained the  
200 remaining 2,620 proteins with intermediate variability. Remarkably, the top three most variable proteins  
201 in BPH are three proteins known or used in the diagnosis of prostate tumors, including prostate-specific  
202 antigen (PSA/KLK3), prostatic acid phosphatase (PAP/ACPP) and Desmin (DES). PSA is an androgen-  
203 regulated kallikrein family serine protease, that is produced by the secretary epithelial cells in acini and  
204 ducts of prostate glands (Balk, Ko et al., 2003). The secreted PSA, originated from prostate tissues, is the  
205 most commonly used, blood-based biomarker for prostate cancer (Hayes & Barry, 2014). However, PSA  
206 screening has remained controversial because of uncertainty surrounding its benefits and risks and the  
207 optimal screening strategy (Barry, 2009). Our data showed that PSA *in situ* was most variable in BPH but

208 more stable in ADCA tissues. Since PSA is regulated by androgen, this indicates androgen-driven  
209 malignant growth of prostate tumor cells. PAP is a non-specific tyrosine phosphatase and a well-studied  
210 tumor suppressor for PCa. PAP has already been used in immunotherapy regimens against PCa (Di  
211 Lorenzo, Buonerba et al., 2011) and is the second most variable protein in BPH after PSA. The variability  
212 of PAP expression was relatively high in ADCA samples, but lower than its variability in BPH samples.  
213 Desmin (DES) constructs class-III intermediate filament in smooth muscle cells. As a marker for prostate  
214 stromal composition, DES expression has already been associated with PCa survival (Ayala, Tuxhorn et  
215 al., 2003). Tuxhorn et al. have shown that prostate cancer-reactive stroma is composed of a  
216 myofibroblast/fibroblast mix with a significant decrease or complete loss of fully differentiated smooth  
217 muscle, whereas normal prostate stroma is predominantly smooth muscle (Tuxhorn, Ayala et al., 2002).  
218 Given the known heterogeneous composition of myoglandular hyperplasia (*i.e.* BPH) out of glandular and  
219 stromal (smooth muscle) elements, the higher variability of DES expression in BPH compared to PCa is  
220 not surprising.

221 To further investigate the protein variability classes, we then performed a gene ontology (GO)  
222 enrichment analysis (**Fig. 4B**). As expected, stable proteins of group no. 1 were enriched for basic cellular  
223 functions that were required irrespective of the tissue state, such as energy metabolism (**Fig. 4B**). Proteins  
224 highly variable in both malignant and benign tissues (group no. 4) were enriched for immunity-associated  
225 processes. Muscle-related proteins exhibited a high degree of heterogeneity in benign tissues, reflecting  
226 the fact that smooth muscle fibers are part of healthy prostate tissues, whereas prostate cancer glands are  
227 per definition closely packed with less intervening stroma (Humphrey et al., 2016). This agrees with the  
228 variability observed for the DES as discussed above. Proteins associated with cell cycle-related functions  
229 such as nucleosome and chromatin assembly displayed a high degree of heterogeneity in malignant  
230 tissues. Thus, our data is consistent with recent findings suggesting that the proliferation rates among  
231 prostate cancer cells can be highly variable (Zellweger, Gunther et al., 2009), and that epigenetic events  
232 are of high importance in prostate carcinogenesis (Beharier, Shusterman et al., 2015, Grasso, Wu et al.,  
233 2012, Plass, Pfister et al., 2013).

234

### 235 **Spatial heterogeneity of biochemical pathways**

236 Based on the determined protein level variance patterns described above we could also  
237 interrogate the ITH of biochemical pathways. To quantify a pathway's variance we computed the average  
238 biological variance (intra-tissue variance) for all human pathways from ConsensusPathDB (Kamburov,  
239 Stelzl et al., 2013) with at least five quantified proteins (**Fig. 4C**). Like the individual proteins, we  
240 grouped pathways into five groups depending on their degrees of heterogeneity in malignant and benign  
241 tissues. Five pathways emerged as being particularly variable in tumor tissues (*i.e.*, average biological



242 variance in malignant samples above 0.02): ‘Fanconi Anemia Pathway’, ‘Meiosis’, ‘Meiotic synapsis’,  
243 ‘Regulation of cell cycle progression by plk3’, as well as ‘Role of brca1 brca2 and atr in cancer  
244 susceptibility’. These pathways are involved in DNA damage response and include proteins such as  
245 serine/threonine-protein kinase ATR and the cohesion complex. The specific role of these pathways in  
246 responding to chromosomal aberrations suggests that the occurrence and repair of double strand breaks  
247 (which are a hallmark of prostate cancer) are heterogeneous within tissue specimens (Haffner, Aryee et  
248 al., 2010). Pathways highly variable only in non-tumorous tissues are markedly enriched for immune  
249 activity. The stromal component of BPH samples demonstrated a high degree of ITH in antigen  
250 processing and presentation, naïve CD8+ T cells signaling, IL12- mediated signaling, interactions  
251 between a lymphoid and a non-lymphoid cell, MHC class I complex expression, NK-cell mediated  
252 cytotoxicity, suggesting the combat between carcinogenesis and immunity. Consistent with the previous  
253 analysis, we observed more variable muscle contraction activity in non-tumorous tissues. The only  
254 pathway variable in both tumorous and non-tumorous tissues was the synthesis of phosphatidic acid, a  
255 critical component of mTOR signaling and a biosynthetic precursor for all cellular acylglycerol lipids  
256 with critical roles in prostate tissue biology (Fang, Vilella-Bach et al., 2001, Foster, 2009).

257

### 258 **Investigation of spatial heterogeneity of selected proteins using immunohistochemistry (IHC) in an** 259 **independent cohort**

260 We further investigated the biological variation of selected proteins from the PCT-SWATH  
261 analysis using a complementary technology in an independent, larger cohort. We constructed a tissue  
262 microarray (TMA) using benign and malignant (ADCA) prostate tissues from 83 additional patients and  
263 established IHC assays to measure the expression of ten representative proteins in the various ITH groups  
264 identified from the PCT-SWATH results, including ACTR1B, DES, PSA, GDF15 as shown in **Fig. 5**, as  
265 well as ACP, ABCF1, NUP93, CUTA, CRAT, and FSTL1 (**Supplementary Fig. 5**). This set of  
266 validation proteins contains some well-established markers for prostate cancer in order to elucidate their  
267 variability within benign and tumorous tissue specimens. The stained TMAs contained duplicate tissue  
268 cores of 48 ADCA and 35 BPH samples. The heterogeneity of proteins was evaluated based on an  
269 immunoreactivity score computed from duplicate tissue spots and measured by the Pearson correlation  
270 coefficient between the two spots for BPH and ADCA respectively (**Fig. 5**). Thus, a high Pearson  
271 correlation score indicates a homogeneous distribution of the respective protein in the TMAs (*i.e.* low  
272 ITH). We found that the degree of ITH determined in the three patients by PCT-SWATH was well  
273 validated in the independent cohort. ACTR1B is an actin-related protein in the dynamin complex to  
274 construct cytoskeleton. This house-keeping protein exhibited a very high degree of correlation in both  
275 BPH ( $r = 0.96$ ) and ADCA ( $r = 0.80$ ) samples, serving as a positive control. In the TMA cohort, DES

276 was more variable in BPH ( $r = 0.51$ ) than in ADCA ( $r = 0.67$ ), which is consistent with proteomics data.  
277 Our TMA data demonstrated that in BPH samples, PSA was found only in the glandular tissue, and  
278 expressed more heterogeneous than in ADCA samples, with blood PSA levels being a non-specific  
279 biomarker for PCa. Growth/differentiation factor 15 (GDF15) is a stress-induced cytokine belonging to  
280 the transforming growth factor beta superfamily (Vanhara, Hampl et al., 2012). This protein is expressed  
281 in highly complex forms with distinct biological functions related to immunity. In various tumors  
282 including prostate cancer, GDF15 interacts with the extracellular matrix and promotes tumor progression  
283 and metastasis (Vanhara et al., 2012). We found GDF15 to be expressed at relatively low levels in BPH  
284 with a low degree of ITH probably due to inflammatory changes of glandular architecture followed by  
285 stromal tissue increase in BPH (Vanhara et al., 2012). In the ADCA samples, GDF15 expression was  
286 elevated with a high degree of variation, indicating complex interactions between tumor cells and the  
287 microenvironment via modulators including GDF15. The high variability of ACP in BPH samples was  
288 also confirmed in this cohort. Proteins grouped as medium heterogeneity including ABCF1, NUP93,  
289 CUTA, CART, and FSTL1 displayed consistent heterogeneity patterns after manual inspection of the  
290 TMA data. Taken together, we observed significant correlations between the heterogeneity measured in  
291 the TMAs and the biological variance measures obtained with PCT-SWATH across all 10 proteins (**Fig.**  
292 **6**).

293

294

## 295 DISCUSSION

296 This study investigated the spatial variability of the prostate proteome, which serves as a basis for  
297 better understanding the biology of PCa protein biomarkers. Protein biomarkers including PSA and  
298 GDF15 have been well studied in PCa, however, their spatial expression in prostate tissues has not been  
299 systematically studied. ITH has been studied at the morphologic and genomic level in diverse cancers,  
300 and it poses a major challenge for cancer biology and diagnosis (Alizadeh et al., 2015). However,  
301 proteomic ITH remains underexplored in prostate cancer, despite the critical roles of proteins in  
302 tumorigenesis and cellular biochemistry in general and the various single cell-based methods.

303 This study represents a technical advance towards understanding spatial ITH at the proteome  
304 level for solid tumors and other tissues. Using the PCT-SWATH methodology (Guo et al., 2015b) and an  
305 associated data analysis strategy (Röst et al., 2014), we achieved deep proteomic coverage (consistent  
306 quantification of 8,248 reviewed SwissProt proteins across the 60 prostate tissue samples), and performed  
307 quantitative analysis of spatial ITH of 3,700 proteins, which were quantified by at least two proteotypic  
308 peptides that showed consistent abundance across samples. Despite the rigorous filtering, we could  
309 quantify a similar number of proteins like other studies of primary tissues, which used extensive peptide

310 fractionation (Zhang, Wang et al., 2014, Zhang, Liu et al., 2016), and a three times higher number of  
311 proteins than a recent proteomic analysis of primary prostate tissue samples (Iglesias-Gato, Wikstrom et  
312 al., 2016). The number of proteins quantified in this study exceeds by 1-2 orders of magnitude the number  
313 of proteins typically quantified by tissue staining, which is the current standard method for protein  
314 quantification in clinical tissue samples. Our data did not achieve single cell resolution like the CyTOF  
315 technology. These technologies, however, quantify orders of magnitude fewer proteins (Amir el, Davis et  
316 al., 2013, Giesen et al., 2014, Levine, Simonds et al., 2015). The data generated in this study are unique  
317 with respect to the structure of the sample set, the degree of proteomic coverage, and the degree of  
318 measurement reproducibility and accuracy. Nevertheless, new MS-based proteomics technologies  
319 enabling analysis of single cells from tissue samples will be desirable to quantify spatial ITH at higher  
320 spatial resolution in future studies.

321         The main goal of this study was not to discover new protein biomarkers; instead we aimed to  
322 characterize the spatial ITH of the prostate proteome and investigate whether the ITH influences the  
323 utility of protein biomarkers and candidates. Our data contributed to the understanding of the following  
324 prostate cancer biology. First, we systematically reported the degree of ITH of 3,700 proteins in prostate  
325 tissues. Although some of these proteins are widely used in clinic, their expression pattern in prostate  
326 tumors was unclear. We found PSA preferentially variable in BPH, while GDF15 tended to vary in  
327 different tumor regions. This finding, together with the ITH pattern of eight more clinically relevant  
328 protein biomarkers, were further investigated and confirmed in an independent cohort of 83 PCa patients  
329 using TMA technology. This additional cohort analysis not only confirm that the PCT-SWATH  
330 technology is a valid and practical extension of IHC and TMA for proteome-scale ITH analysis of clinical  
331 tissue samples, but also consolidated the spatial variability of these proteins in prostate tissues, providing  
332 guidance for clinical application of these proteins as biomarkers. We found protein ITH patterns to vary  
333 between tissue types due to their biological functions and interplay with the microenvironment.

334         Second, the data also shed light on the heterogeneity of multiple biochemical pathways.  
335 Interestingly, benign tissue displayed a high degree of variability in immunity-related signaling pathways,  
336 whereas tumor tissues, characterized by enhanced proliferation and DNA-damage, exhibited high degree  
337 of heterogeneity in several DNA damage response pathways, suggesting that spatially variable DNA  
338 repair pathways probably contributed to genomic heterogeneity during the evolution of prostate cancers.  
339 Further, we found that the degree of intra-tissue variability of multiple pathways was slightly higher in  
340 benign specimens compared to malignant tissues (**Fig. 4**), which may be due to the more complex  
341 structure of healthy tissues involving a larger number of distinct cell types, while in tumorous tissues  
342 most cell types are replaced by tumor cells.

343           The observed intra-tissue protein variability patterns have implications that extend beyond the  
344 present study to protein biomarker studies in general and have specific significance for biomarker studies  
345 in the context of personalized medicine, where sample availability is generally sparse. Our data suggest  
346 that the variation of some protein levels between patients is similar in magnitude to the variation within a  
347 single prostate. These findings underline the significance of low intra-tissue variability as an important  
348 property of a clinical protein biomarker. In fact, the observed variability patterns provide a rational  
349 explanation why some previously published tissue biomarker studies did not produce concordant results.  
350 Similar conclusions were drawn in an earlier study, in which the abundance variability of plasma proteins  
351 was analyzed in a twin cohort (Liu, Buil et al., 2015). The data indicated that those biomarker candidates  
352 that were proposed in the literature and eventually approved for clinical use showed low levels of  
353 variability derived from genetic differences in a population. In contrast, biomarker candidates proposed in  
354 the literature that showed a high degree of genetically caused abundance variation in a population were  
355 rarely validated. Our data add a new perspective to this problem: a candidate biomarker may show high  
356 variability between patients when quantified using single needle biopsies per patient. However, the  
357 tumor-wide average concentrations may not be substantially different, and the true cause of the apparent  
358 inter-patient variability may be ITH, rather than rooted in the biochemical difference between normal and  
359 tumor tissues. Therefore, we suggest that intra-tissue variability of a protein or a pathway be used as an  
360 important criterion for the assessment of protein biomarker candidates, in addition to other parameters  
361 such as expression level and biochemical function. Including more biological replicates per patient to  
362 average out protein ITH or increasing patient numbers to account for variability may not always be  
363 possible. Thus, our work provides an important lead as to how ITH can be tackled even for small patient  
364 and sample numbers in clinically realistic scenarios.

## 365 MATERIALS & METHODS

366

### 367 Patients and samples for PCT-SWATH analyses

368 The prostates from three patients after prostatectomy were cut into tissue sections (thickness:  
369 about 3 mm). Fresh BPH and ADCA tissue sections were frozen and embedded in O.C.T.. The tissue  
370 were examined by trained pathologists and graded similarly according to the Gleason system as shown in  
371 **Fig. 1**. Tumorous tissues from each patient contained acinar prostate tumors, while one patient included  
372 an extra ductal prostate tumor. To obtain biopsy-scale tissue samples for PCT-SWATH analysis, we  
373 utilized a needle to punch out tissue cylinders (diameter: 1 mm, length: ~ 3 mm) at the locations as shown  
374 in **Fig. 1**. Multiple (three or six) punches were obtained from each area. The Ethics Committee of the  
375 Canton of Zurich approved all procedures involving human fresh frozen material. All three patients were  
376 part of the Zurich prostate cancer outcomes cohort study (ProCOC, KEK-ZH-No. 2008-0040) (Umbehr,  
377 Kessler et al., 2008, Wettstein, Saba et al., 2017), and each patient signed an informed consent form.

378

### 379 PCT-SWATH

380 The tissue samples were first washed to eliminate O.C.T., followed by PCT-assisted tissue lysis  
381 and protein digestion, and SWATH-MS analysis, as described previously (Guo et al., 2015b). Briefly,  
382 each tissue punch was washed with 70% ethanol / 30% water (30 s), water (30 s), 70% ethanol / 30%  
383 water (5 min, twice), 85% ethanol / 15% water (5 min, twice), and 100% ethanol (5 min, twice).  
384 Subsequently, the tissue punches were placed in PCT-MicroTubes with PCT-MicroPestle and 30  $\mu$ l lysis  
385 buffer containing 8 M urea, 0.1 M ammonium bicarbonate, Complete protease inhibitor cocktail (Roche)  
386 using a barocycler (model NEP2320-45k, PressureBioSciences, South Easton, MA) which offers cycling  
387 alternation of high pressure (45,000 p.s.i., 50 s per cycle) and ambient pressure (14.7 p.s.i., 10 s per cycle)  
388 for 1 h. The extracted proteins were then reduced and alkylated prior to lys-C and trypsin-mediated  
389 proteolysis under pressure cycling. Lys-C (Wako; enzyme-to-substrate ratio, 1:40) -mediated proteolysis  
390 was performed under 45 cycles of pressure alternation (20,000 p.s.i. for 50 s per cycle and 14.7 p.s.i. for  
391 10 s per cycle), followed by trypsin (Promega; enzyme-to-substrate ratio, 1:20)-mediated proteolysis  
392 using the same cycling scheme for 90 cycles. The resultant peptides were cleaned by SEP-PAC C18  
393 (Waters Corp., Milford, MA) and analyzed, after spike-in 10% iRT peptides, using SWATH-MS  
394 following the 32-fixed-size-window scheme as described previously with a 5600 TripleTOF mass  
395 spectrometer (Sciex) and a 1D+ Nano LC system (Eksigent, Dublin, CA). The LC gradient was  
396 formulated with buffer A (2% acetonitrile and 0.1% formic acid in HPLC water) and buffer B (2% water  
397 and 0.1% formic acid in acetonitrile) through an analytical column (75  $\mu$ m  $\times$  20 cm) and a fused silica  
398 PicoTip emitter (New Objective, Woburn, MA, USA) with 3- $\mu$ m 200 Å Magic C18 AQ resin (Michrom

399 BioResources, Auburn, CA, USA). Peptide samples were separated with a linear gradient of 2% to 35%  
400 buffer B over 120 min at a flow rate of 0.3  $\mu\text{l min}^{-1}$ . Ion accumulation time for MS1 and MS2 was set at  
401 100 ms, leading to a total cycle time of 3.3 s.

402

### 403 **SWATH assays for prostate tissue proteome**

404 We also analyzed unfractionated prostate tissue digests prepared by the PCT method using Data  
405 Dependent Acquisition (DDA) mode in a tripleTOF mass spectrometer over a gradient of 2 hours as  
406 described previously (Röst et al., 2014). We spiked iRT peptides (Escher, Reiter et al., 2012) into each  
407 sample to enable retention time calibration among different samples. We then combined this library with  
408 the DDA files from pan-human library (Rosenberger, Koh et al., 2014). All together we analyzed 422  
409 DDA files using X!Tandem (MacLean, Eng et al., 2006) and OMSSA (Geer, Markey et al., 2004) against  
410 a target-decoy, non-redundant human UniProtKB/Swiss-Prot protein database (Oct 21, 2016) containing  
411 20,160 protein sequences and the iRT peptide sequences. Reversed protein sequences were used as decoy  
412 sequences. We allowed maximal two missed cleavages for fully tryptic peptides, and 50 p.p.m. for  
413 peptide precursor mass error, and 0.1 Da for peptide fragment mass error. Static modification included  
414 carbamidomethyl at cysteine, while variable modification included oxidation at methionine. Search  
415 results from X!Tandem and OMSSA were further analyzed through Trans-Proteomic Pipeline (TPP,  
416 version 4.6.0) (Deutsch, Mendoza et al., 2010) using PeptideProphet and iProphet, followed by SWATH  
417 assay library building procedures as detailed previously (Guo et al., 2015b, Schubert, Gillet et al., 2015).  
418 Altogether, we identified 160,442 peptides with <1% FDR.

419

### 420 **Peptide quantification using OpenSWATH**

421 SWATH files were analyzed using the prostate tissue proteome assay library described above and  
422 OpenSWATH software as described previously (Röst et al., 2014). Briefly, wiff files were converted into  
423 mzXML files using ProteoWizard `msconvert` v.3.0.3316, and then mzML files using OpenMS (Sturm,  
424 Bertsch et al., 2008) tool `FileConverter`. OpenSWATH was performed using the tool  
425 `OpenSWATHWorkflow` with input files including the mzXML file, the TraML library file, and TraML  
426 file for iRT peptides. The false discovery rate for peptide identification was below 0.1%. High confidence  
427 peptide features from different samples were aligned using the algorithm `TRansition of Identification`  
428 `Confidence (TRIC)` (version r238), which is available from  
429 <https://pypi.python.org/pypi/msproteomicstools> or <https://code.google.com/p/msproteomicstools/>. The  
430 following parameters for the `feature_alignment.py` are as follows: `max_rt_diff = 30`, `method =`  
431 `global_best_overall`, `nr_high_conf_exp = 2`, `target_fdr = 0.001`, `use_score_filter = 1`.

432

### 433 **Protein quantification**

434           The concentration of each protein was quantified through the simultaneous measurement of  
435 several peptides. To optimize the protein quantification, we developed a new computational method,  
436 which combines maximally consistent peptides for each protein and excludes inconsistent (*i.e.*  
437 uncorrelated) peptides (Picotti et al., 2013). For example, variation of post-translational modifications  
438 (PTM) would result in peptide level variation that is uncorrelated across samples, because mostly only  
439 one of the two peptides would be affected by the PTM.(Picotti et al., 2013). Given a set of peptides  
440 unambiguously assigned to a single protein, consistent peptides were selected using the following  
441 procedure: all pairwise correlations between all peptides of a protein across the samples were calculated  
442 at first. Peptide pairs with a Pearson correlation coefficient (R) of at least 0.3 were determined, resulting  
443 in clusters of correlated peptides. This procedure yielded one or more peptide clusters per protein. We  
444 used the largest cluster of each protein and we quantified the protein's concentration as the average  
445 intensity across the peptides in that cluster. The minimum cluster size was set to 2 and proteins without a  
446 cluster of at least two correlated peptides were removed from the subsequent analysis. This procedure  
447 resulted in very robust concentration estimates for 3,700 proteins with high correlation between technical  
448 replicates ( $R \geq 0.95$ ) and no missing values.

449

### 450 **Determining the biological variance between punches in a specific tissue (intra-tissue variance)**

451           Measurements of protein abundance differences between individual punches are affected by a  
452 combination of biological and technical factors. Thus, to quantify the biological variation between  
453 punches we need to subtract the technical variance from the total variance, *i.e.* the combined variance due  
454 to technical and biological factors. Estimating the biological variance of protein levels between punches  
455 therefore requires estimates of the technical variance and the total variance. Intuitively, one would  
456 estimate both variances using a standard approach such as ANOVA in a single statistical model.  
457 However, technical replicates are paired because they come from the same punch and thus they are not  
458 independent, whereas the total variance needs to be estimated across punches, *i.e.* involving partially  
459 independent measurements.

460           Therefore we decided to separately estimate technical and total variances. Here, technical  
461 variance was estimated from the dispersion of measurements between paired technical replicates and total  
462 variance was estimated from the dispersion of measurements between independent punches from the  
463 same specimen. Compared to an approach estimating both technical and total variance in a single  
464 statistical model, our approach has the caveat that the two variance estimates can be inconsistent in the  
465 sense that the estimated total variance can be smaller than the estimated technical variance. Obviously,  
466 this happens only for those proteins where the technical noise is large compared to the biological

467 variance, in which case it is anyways impossible to reliably estimate the true biological variance (no  
468 matter which statistical approach is taken). We therefore conservatively accept that in those cases we  
469 cannot provide an estimate of the biological variance. However, we assume that in most of those cases the  
470 biological variance will be small compared to the other proteins for which we could estimate a biological  
471 variance.

472 In detail, the variances were estimated in the following way.

473 First, the protein concentrations (computed from peptide intensities as described above) were  
474 log10-transformed. Next, protein concentrations were quantile normalized per sample. As the signal  
475 distributions between non-tumorous (benign) and tumorous tissue (malignant: acinar and ductal) differed  
476 significantly, the normalization was performed separately for each tissue type. For each protein, we  
477 computed the technical variation for each sample and averaged the inter-replicate variance across all 30  
478 samples (Tukey, 1977). Since technical replicates are (obviously) paired, the technical variance was  
479 estimated as the dispersion of the two replicates from their sample mean averaged across all punches ( $n =$   
480 30). Thus, the technical variance  $VAR_{TECH}$  of protein  $i$  was estimated as:

$$481 \quad VAR_{TECH_i} = \frac{1}{n} \sum_{j=1}^n \frac{(x_{i,ja} - x_{i,jb})^2}{2}$$

482 with  $x_{i,ja}$  and  $x_{i,jb}$  being the two technical replicates ( $a$  and  $b$ ) of the protein level measurements  
483 from punch  $j$ . In this case, no batch correction was performed, because batch correction would reduce the  
484 technical variance (technical replicates were always in different batches), which might lead to  
485 underestimation of the technical variance. The final estimate of technical variances was computed after  
486 removing outliers above and below the  $1.5 * IQR$  of 30 samples based on Tukey's method (Tukey, 1977).

487 The total variances between punches (*i.e.* the combined variance from technical noise and  
488 biological variance) were initially computed for each batch separately. Thus, variation among punches  
489 from the same specimen (same patient  $p$  and same tissue type  $t$ ) were averaged. Finally, total variances  
490  $VAR_{TOT}$  between punches were averaged across batches.

$$491 \quad VAR_{TOT_i}(p, t) = \frac{1}{2} \left[ VAR(x_{i,ja}, j \in P(p, t)) + VAR(x_{i,jb}, j \in P(p, t)) \right]$$

492 Where  $P(p, t)$  denotes all punches  $j$  from patient  $p$  and tissue  $t$  (*i.e.* either benign, acinar, or  
493 ductal). The indices  $a$  and  $b$  denote the two technical replicates, as above. Thus, total variances were  
494 estimated purely from deviations *within* batches and are (unlike technical variances) not affected by  
495 batch-to-batch variation. As a consequence, technical variances are biased towards larger values  
496 compared to total variances. This approach is conservative in the sense that it minimizes the number of  
497 proteins that are falsely classified as having variable concentrations within tissues. Thus, this approach  
498 will likely underestimate the true number of proteins with large biological intra-tissue variance. Given the



499 total variance and technical variance, the biological variance  $VAR_{BIO}$  of protein  $i$  was computed as  
500 follows:

$$501 \quad VAR_{BIO_i}(p, t) = VAR_{TOT_i}(p, t) - VAR_{TECH_i}$$

502 This scheme generated seven independent estimates of total variance per protein: four for the  
503 patients no. 1 and no. 2 (benign and malignant acinar tissues) and three for patient no. 3 (benign, acinar,  
504 and ductal). The intra-tissue variance shown in Figure 4 is the average biological variance of a given  
505 protein across all patients and tissue types. The tissue-specific variances used for Figure 5 are the average  
506 variances across the patients for the respective tissues (benign, acinar, ductal). The biological variance in  
507 tumor was estimated as the average of all acinar and the ductal (patient 3) tumor regions.

508

### 509 **Grouping of proteins and pathways based on their variability**

510 In cases where the estimated technical variance is greater than the estimated total variance,  
511 subtracting the technical from the total variance yields a negative ‘variance estimate’ (**Supplementary**  
512 **Fig 4**). Because these negative ‘variances’ are the result of our imperfect variance estimates, the  
513 distribution of these values can be used to quantify the inherent uncertainty in our estimates of the  
514 biological variance. Thus, we can use the distribution of the absolute values (the ‘mirror distribution’ into  
515 the positive range) as a background distribution for the Null hypothesis that the true biological variance is  
516 indistinguishable from zero (*or*: that the total observed variance is exclusively due to technical variance).  
517 Based on this approach, 797 proteins had p-values below 0.01 and were thus classified as biologically  
518 variable proteins (*i.e.* significantly variable within the same specimen). These 797 variable proteins were  
519 further sub-classified as follows: if the ratio of *biological variance in benign* to *biological variance in*  
520 *tumor* was above 2 they were classified as "variable in non-tumor" (339 proteins); if the ratio of  
521 *biological variance in tumor* to *biological variance in normal* was above 2, proteins were classified as  
522 "variable in tumor" (93 proteins); 365 proteins with similar variances in both tissue types (*i.e.* not  
523 different by more than a factor of 2) were classified as “variable in non-tumor and tumor”. Stable proteins  
524 were defined by choosing the 100 proteins with the lowest biological variance. Remaining proteins, which  
525 were not assigned to any of the above four groups, were classified as “medium heterogeneity” proteins.

526 Note that our computation of empirical p-values for determining variable proteins is not critical  
527 for the conclusions. If we had simply chosen the top 200 most variable proteins (as the basis for groups 1-  
528 3) and compared them to the 200 most stable proteins (group 4) the conclusions would be virtually  
529 identical.

530

### 531 **Gene Set Enrichment Analysis**

532 Gene Ontology (GO) enrichment of proteins was performed using topGO, which takes the  
533 topology of the ontology into account. The enrichment analysis was carried out by using Fisher's exact  
534 test with the background of measured proteins in this study. We excluded GO terms with less than 10  
535 proteins and with more than 300 proteins from the analysis (the former are too small, the latter are too  
536 generic). Further, we reported only GO terms that had at least 4 proteins enriched (overlapping).

537 Intra-tissue heterogeneity of entire biochemical pathways was determined according to the  
538 protein level variance. Pathway variability was calculated by averaging the biological variances of all  
539 proteins annotated for a given ConsensusPathDB pathway. We required that each pathway contained at  
540 least five quantified proteins. ConsensusPathDB combines pathway annotations from different sources.  
541 Thus, in some cases the same pathway is reported more than ones. In such case the pathway variant with  
542 the largest number of quantified proteins was used.

543  
544 **Determining the variance between tissues (inter-tissue variance) and between patients (inter-patient**  
545 **variance)**

546 Batch effects were corrected by centering each protein's concentration per batch. In our  
547 experimental design, batches were balanced in the sense that each batch had the same number of benign  
548 and malignant samples (3 of each) and each batch had the same number of samples from the same patient  
549 (2 patients per batch, 3 samples from each patient).

550 Inter-tissue variances were estimated using concentrations centered per patient (subtracting  
551 patient mean). Inter-patient variances were estimated using concentrations centered per tissue type  
552 (subtracting tissue mean across patients). All of those computations were based on batch-corrected  
553 concentrations and after averaging technical replicates. Batch-corrected values were also used for Figure  
554 2.

555  
556 **Patient cohort and tissue microarray (TMA)**

557 The Ethics Committee of the Kanton St. Gallen, Switzerland approved all procedures involving  
558 human materials used in this TMA, and each patient signed an informed consent. For the study, patients  
559 with BPH and matching ADCA were included, whereas advanced prostate cancer, infectious or  
560 inflammatory diseases, or other malignancies fulfilled exclusion criteria as described previously (Cima,  
561 Schiess et al., 2011). A TMA was constructed using formalin-fixed, paraffin-embedded tissue samples  
562 derived from 83 patients (BPH, n = 35; ADCA, n = 48).

563  
564 **Immunohistochemical staining and evaluation**

565 The following primary antibodies were used to stain 4 $\mu$ m slides of the TMA using the Ventana  
566 Benchmark (Roche Ventana Medical Systems, Inc., Tucson, AZ, USA) automated staining system:  
567 ACTR1B (1:400; Abcam, 60 min pretreatment), Desmin/DES (1:20; DAKO A/S, 16 min pretreatment),  
568 KLK3/PSA (1: 10000; DAKO A/S) and GDF15 (1:50; biorbyt, 30 min pretreatment), ACPP (1:2000;  
569 DAKO A/S), ABCF1 (1:50; Novus Biologicals, 90 min pretreatment), NUP93 (1:50; NovusBiologicals,  
570 60 min pretreatment), CUTA (1:100; LifespanBiosciences, 60 min pretreatment), CRAT (1:100; Atlas  
571 Antibodies, 30 min pretreatment), and FSTL1 (1:100; Atlas Antibodies, 16 min pretreatment). Detection  
572 was performed with ChromoMap Kit (Ventana) for ABCF1, PCP4, CUTA and OptiView DAB Kit  
573 (Ventana) for the others (Desmin, KLK3/PSA, NUP93, CRAT, FSTL1,PAP) using the heat-induced  
574 epitope retrieval CC1 solution. Slides were counterstained with hematoxylin (Ventana), dehydrated and  
575 mounted. For GDF15 4 $\mu$ m slides were stained using the Leica Bond (Leica Biosystems, Muttentz,  
576 Switzerland) automated staining system. For detection the Bond Polymer Refine Detection kit and heat-  
577 induced epitope retrieval HIER2 solution (Leica Biosystems) following Hematoxylin counterstaining was  
578 used. Staining intensities for each antibody were evaluated in a semi-quantitative, 4-tier manner (negative  
579 = 0, weak = 1, moderate = 2 and strong = 3), along with the occupied area (in 1%, 3%, 5% and above  
580 10% steps), by one pathologist (N.J.R.). An immunoreactivity score (IRS; staining intensity multiplied by  
581 percentage of spot; similar to the recommendations by Remmele & Stegner (Remmele & Stegner, 1987)  
582 consisting of "staining intensity x area (%)" was calculated.

583

#### 584 **Data deposition**

585 The SWATH raw data and analyzed data as well as assay library are deposited in PRIDE  
586 (Vizcaino et al., 2014). For the SWATH data of the three patients: Project accession: PXD003497;  
587 Username: [reviewer45594@ebi.ac.uk](mailto:reviewer45594@ebi.ac.uk); Password: Vvl6EFPj. For the SWATH data of the 27 patients:  
588 Project accession: PXD004589; Username: reviewer29994@ebi.ac.uk; Password: 1zHGceA9.

589

#### 590 **Acknowledgements**

591 This work was supported by the SystemsX.ch project PhosphoNet PPM (to R.A. and P.J.W.), the  
592 Swiss National Science Foundation (grant no. 3100A0-688 107679 to R.A.), the Foundation for Research  
593 in Science and the Humanities at the University of Zurich (to P.J.W.), the European Research Council  
594 (grant no. ERC-2008-AdG 233226 and ERC-2014-AdG670821 to R.A.), and the German Federal  
595 Ministry of Education and Research (BMBF; grants: Sybacol & PhosphoNetPPM to L.L. and A.B.). We  
596 thank O.L. Kon for critical reading of the manuscript.

597

#### 598 **Author contributions**

599 A.B., T.G., P.J.W. and R.A. designed the project. P.J.W., Q.Z., C.E.W., C.P, C.F, K.S., J.H.R. and N.J.R.  
600 procured the samples. T.G. performed the PCT-SWATH analysis. L.L., K.C. and A.B. designed and  
601 performed the statistical analyses. L.L., A.B., T.G. and R.A. interpreted the results. P.J.W., C.F., N.J.R.,  
602 Q.Z., U.W. and W.J. performed tissue microarray validation. T.G., L.L., A.B., Q.Z., and R.A. wrote the  
603 manuscript with inputs from all co-authors. R.A., A.B. and P.J.W. supported and supervised the project.

604

#### 605 **Competing financial interests**

606 R.A. holds shares of Biognosys AG, which operates in the field covered by the article. The research group  
607 of R.A. is supported by SCIEEX, which provides access to prototype instrumentation, and Pressure  
608 Biosciences, which provides access to advanced sample preparation instrumentation.

609

610

#### 611 **References**

612 Alizadeh AA, Aranda V, Bardelli A, Blanpain C, Bock C, Borowski C, Caldas C, Califano A, Doherty M,  
613 Elsner M, Esteller M, Fitzgerald R, Korbelt JO, Lichter P, Mason CE, Navin N, Pe'er D, Polyak K, Roberts  
614 CW, Siu L et al. (2015) Toward understanding and exploiting tumor heterogeneity. *Nat Med* 21: 846-53  
615 Amir el AD, Davis KL, Tadmor MD, Simonds EF, Levine JH, Bendall SC, Shenfeld DK, Krishnaswamy S,  
616 Nolan GP, Pe'er D (2013) viSNE enables visualization of high dimensional single-cell data and reveals  
617 phenotypic heterogeneity of leukemia. *Nat Biotechnol* 31: 545-52  
618 Ayala G, Tuxhorn JA, Wheeler TM, Frolov A, Scardino PT, Ohori M, Wheeler M, Spitler J, Rowley DR  
619 (2003) Reactive stroma as a predictor of biochemical-free recurrence in prostate cancer. *Clin Cancer Res*  
620 9: 4792-801  
621 Balk SP, Ko YJ, Bubley GJ (2003) Biology of prostate-specific antigen. *J Clin Oncol* 21: 383-91  
622 Barry MJ (2009) Screening for prostate cancer--the controversy that refuses to die. *The New England*  
623 *journal of medicine* 360: 1351-4  
624 Beharier O, Shusterman E, Szaingurten-Solodkin I, Weintraub AY, Sheiner E, Swissa SS, Gitler D,  
625 Hershkovitz R (2015) Placental growth factor concentration in maternal circulation decreases after fetal  
626 death: lessons from a case series study. *Archives of gynecology and obstetrics* 292: 1027-32  
627 Boutros PC, Fraser M, Harding NJ, de Borja R, Trudel D, Lalonde E, Meng A, Hennings-Yeomans PH,  
628 McPherson A, Sabelnykova VY, Zia A, Fox NS, Livingstone J, Shiah YJ, Wang J, Beck TA, Have CL, Chong T,  
629 Sam M, Johns J et al. (2015) Spatial genomic heterogeneity within localized, multifocal prostate cancer.  
630 *Nat Genet* 47: 736-45  
631 Cancer Genome Atlas Research N (2013) Genomic and epigenomic landscapes of adult de novo acute  
632 myeloid leukemia. *The New England journal of medicine* 368: 2059-74  
633 Cima I, Schiess R, Wild P, Kaelin M, Schuffler P, Lange V, Picotti P, Ossola R, Templeton A, Schubert O,  
634 Fuchs T, Leippold T, Wyler S, Zehetner J, Jochum W, Buhmann J, Cerny T, Moch H, Gillissen S, Aebbersold  
635 R et al. (2011) Cancer genetics-guided discovery of serum biomarker signatures for diagnosis and  
636 prognosis of prostate cancer. *Proc Natl Acad Sci U S A* 108: 3342-7  
637 Cyll K, Ersvaer E, Vlatkovic L, Pradhan M, Kildal W, Avranden Kjaer M, Kleppe A, Hveem TS, Carlsen B, Gill  
638 S, Loffeler S, Haug ES, Waehre H, Sooriakumaran P, Danielsen HE (2017) Tumour heterogeneity poses a  
639 significant challenge to cancer biomarker research. *Br J Cancer* 117: 367-375  
640 Dalerba P, Cho RW, Clarke MF (2007) Cancer stem cells: models and concepts. *Annu Rev Med* 58: 267-84

641 Deutsch EW, Mendoza L, Shteynberg D, Farrah T, Lam H, Tasman N, Sun Z, Nilsson E, Pratt B, Prazen B,  
642 Eng JK, Martin DB, Nesvizhskii AI, Aebersold R (2010) A guided tour of the Trans-Proteomic Pipeline.  
643 *Proteomics* 10: 1150-9  
644 Di Lorenzo G, Buonerba C, Kantoff PW (2011) Immunotherapy for the treatment of prostate cancer. *Nat*  
645 *Rev Clin Oncol* 8: 551-61  
646 Ding L, Ley TJ, Larson DE, Miller CA, Koboldt DC, Welch JS, Ritchey JK, Young MA, Lamprecht T, McLellan  
647 MD, McMichael JF, Wallis JW, Lu C, Shen D, Harris CC, Dooling DJ, Fulton RS, Fulton LL, Chen K, Schmidt  
648 H et al. (2012) Clonal evolution in relapsed acute myeloid leukaemia revealed by whole-genome  
649 sequencing. *Nature* 481: 506-10  
650 Domon B, Aebersold R (2010) Options and considerations when selecting a quantitative proteomics  
651 strategy. *Nat Biotechnol* 28: 710-21  
652 Epstein JI, Egevad L, Amin MB, Delahunt B, Srigley JR, Humphrey PA, Grading C (2016) The 2014  
653 International Society of Urological Pathology (ISUP) Consensus Conference on Gleason Grading of  
654 Prostatic Carcinoma: Definition of Grading Patterns and Proposal for a New Grading System. *The*  
655 *American journal of surgical pathology* 40: 244-52  
656 Escher C, Reiter L, MacLean B, Ossola R, Herzog F, Chilton J, MacCoss MJ, Rinner O (2012) Using iRT, a  
657 normalized retention time for more targeted measurement of peptides. *Proteomics* 12: 1111-21  
658 Fang Y, Vilella-Bach M, Bachmann R, Flanigan A, Chen J (2001) Phosphatidic acid-mediated mitogenic  
659 activation of mTOR signaling. *Science* 294: 1942-5  
660 Foster DA (2009) Phosphatidic acid signaling to mTOR: signals for the survival of human cancer cells.  
661 *Biochim Biophys Acta* 1791: 949-55  
662 Geer LY, Markey SP, Kowalak JA, Wagner L, Xu M, Maynard DM, Yang X, Shi W, Bryant SH (2004) Open  
663 mass spectrometry search algorithm. *J Proteome Res* 3: 958-64  
664 Gerlinger M, Rowan AJ, Horswell S, Larkin J, Endesfelder D, Gronroos E, Martinez P, Matthews N,  
665 Stewart A, Tarpey P, Varela I, Phillimore B, Begum S, McDonald NQ, Butler A, Jones D, Raine K, Latimer C,  
666 Santos CR, Nohadani M et al. (2012) Intratumor heterogeneity and branched evolution revealed by  
667 multiregion sequencing. *The New England journal of medicine* 366: 883-92  
668 Giesen C, Wang HA, Schapiro D, Zivanovic N, Jacobs A, Hattendorf B, Schuffler PJ, Grolimund D,  
669 Buhmann JM, Brandt S, Varga Z, Wild PJ, Gunther D, Bodenmiller B (2014) Highly multiplexed imaging of  
670 tumor tissues with subcellular resolution by mass cytometry. *Nat Methods* 11: 417-22  
671 Gillet LC, Navarro P, Tate S, Rost H, Selevsek N, Reiter L, Bonner R, Aebersold R (2012) Targeted data  
672 extraction of the MS/MS spectra generated by data-independent acquisition: a new concept for  
673 consistent and accurate proteome analysis. *Mol Cell Proteomics* 11: O111 016717  
674 Grasso CS, Wu YM, Robinson DR, Cao X, Dhanasekaran SM, Khan AP, Quist MJ, Jing X, Lonigro RJ,  
675 Brenner JC, Asangani IA, Ateeq B, Chun SY, Siddiqui J, Sam L, Anstett M, Mehra R, Prensner JR,  
676 Palanisamy N, Ryslik GA et al. (2012) The mutational landscape of lethal castration-resistant prostate  
677 cancer. *Nature* 487: 239-43  
678 Guo T, Kouvonen P, Koh CC, Gillet LC, Wolski WE, Rost HL, Rosenberger G, Collins BC, Blum LC, Gillessen  
679 S, Joerger M, Jochum W, Aebersold R (2015a) Rapid mass spectrometric conversion of tissue biopsy  
680 samples into permanent quantitative digital proteome maps. *Nature medicine* 21: 407-13  
681 Guo T, Kouvonen P, Koh CC, Gillet LC, Wolski WE, Rost HL, Rosenberger G, Collins BC, Blum LC, Gillessen  
682 S, Joerger M, Jochum W, Aebersold R (2015b) Rapid mass spectrometric conversion of tissue biopsy  
683 samples into permanent quantitative digital proteome maps. *Nat Med*  
684 Haffner MC, Aryee MJ, Toubaji A, Esopi DM, Albadine R, Gurel B, Isaacs WB, Bova GS, Liu W, Xu J,  
685 Meeker AK, Netto G, De Marzo AM, Nelson WG, Yegnasubramanian S (2010) Androgen-induced TOP2B-  
686 mediated double-strand breaks and prostate cancer gene rearrangements. *Nat Genet* 42: 668-75

687 Haffner MC, Mosbrugger T, Esopi DM, Fedor H, Heaphy CM, Walker DA, Adejola N, Gurel M, Hicks J,  
688 Meeker AK, Halushka MK, Simons JW, Isaacs WB, De Marzo AM, Nelson WG, Yegnasubramanian S  
689 (2013) Tracking the clonal origin of lethal prostate cancer. *J Clin Invest* 123: 4918-22  
690 Hayes JH, Barry MJ (2014) Screening for prostate cancer with the prostate-specific antigen test: a review  
691 of current evidence. *JAMA* 311: 1143-9  
692 Humphrey PA, Moch H, Cubilla AL, Ulbright TM, Reuter VE (2016) The 2016 WHO Classification of  
693 Tumours of the Urinary System and Male Genital Organs-Part B: Prostate and Bladder Tumours. *Eur Urol*  
694 70: 106-119  
695 Iglesias-Gato D, Wikstrom P, Tyanova S, Lavalley C, Thysell E, Carlsson J, Hagglof C, Cox J, Andren O,  
696 Stattin P, Egevad L, Widmark A, Bjartell A, Collins CC, Bergh A, Geiger T, Mann M, Flores-Morales A  
697 (2016) The Proteome of Primary Prostate Cancer. *Eur Urol* 69: 942-52  
698 Jones S, Chen WD, Parmigiani G, Diehl F, Beerewinkel N, Antal T, Traulsen A, Nowak MA, Siegel C,  
699 Velculescu VE, Kinzler KW, Vogelstein B, Willis J, Markowitz SD (2008) Comparative lesion sequencing  
700 provides insights into tumor evolution. *Proc Natl Acad Sci U S A* 105: 4283-8  
701 Kamburov A, Stelzl U, Lehrach H, Herwig R (2013) The ConsensusPathDB interaction database: 2013  
702 update. *Nucleic Acids Res* 41: D793-800  
703 Kristiansen G (2018) Markers of clinical utility in the differential diagnosis and prognosis of prostate  
704 cancer. *Mod Pathol* 31: S143-155  
705 Levine JH, Simonds EF, Bendall SC, Davis KL, Amir el AD, Tadmor MD, Litvin O, Fienberg HG, Jager A,  
706 Zunder ER, Finck R, Gedman AL, Radtke I, Downing JR, Pe'er D, Nolan GP (2015) Data-Driven Phenotypic  
707 Dissection of AML Reveals Progenitor-like Cells that Correlate with Prognosis. *Cell* 162: 184-97  
708 Liu Y, Buil A, Collins BC, Gillet LC, Blum LC, Cheng LY, Vitek O, Mouritsen J, Lachance G, Spector TD,  
709 Dermitzakis ET, Aebersold R (2015) Quantitative variability of 342 plasma proteins in a human twin  
710 population. *Mol Syst Biol* 11: 786  
711 MacLean B, Eng JK, Beavis RC, McIntosh M (2006) General framework for developing and evaluating  
712 database scoring algorithms using the TANDEM search engine. *Bioinformatics* 22: 2830-2  
713 Magi-Galluzzi C, Xu X, Hlatky L, Hahnfeldt P, Kaplan I, Hsiao P, Chang C, Loda M (1997) Heterogeneity of  
714 androgen receptor content in advanced prostate cancer. *Mod Pathol* 10: 839-45  
715 Murtaza M, Dawson SJ, Pogrebniak K, Rueda OM, Provenzano E, Grant J, Chin SF, Tsui DW, Marass F,  
716 Gale D, Ali HR, Shah P, Contente-Cuomo T, Farahani H, Shumansky K, Kingsbury Z, Humphray S, Bentley  
717 D, Shah SP, Wallis M et al. (2015) Multifocal clonal evolution characterized using circulating tumour DNA  
718 in a case of metastatic breast cancer. *Nat Commun* 6: 8760  
719 Picotti P, Clement-Ziza M, Lam H, Campbell DS, Schmidt A, Deutsch EW, Rost H, Sun Z, Rinner O, Reiter L,  
720 Shen Q, Michaelson JJ, Frei A, Alberti S, Kusebauch U, Wollscheid B, Moritz RL, Beyer A, Aebersold R  
721 (2013) A complete mass-spectrometric map of the yeast proteome applied to quantitative trait analysis.  
722 *Nature* 494: 266-70  
723 Plass C, Pfister SM, Lindroth AM, Bogatyrova O, Claus R, Lichter P (2013) Mutations in regulators of the  
724 epigenome and their connections to global chromatin patterns in cancer. *Nat Rev Genet* 14: 765-80  
725 Powell BS, Lazarev AV, Carlson G, Ivanov AR, Rozak DA (2012) Pressure cycling technology in systems  
726 biology. *Methods Mol Biol* 881: 27-62  
727 Remmele W, Stegner HE (1987) [Recommendation for uniform definition of an immunoreactive score  
728 (IRS) for immunohistochemical estrogen receptor detection (ER-ICA) in breast cancer tissue]. *Pathologe*  
729 8: 138-40  
730 Rosenberger G, Koh CC, Guo T, Rost HL, Kouvonen P, Collins BC, Heusel M, Liu Y, Caron E, Vichalkovski A,  
731 Faini M, Schubert OT, Faridi P, Ebhardt HA, Matondo M, Lam H, Bader SL, Campbell DS, Deutsch EW,  
732 Moritz RL et al. (2014) A repository of assays to quantify 10,000 human proteins by SWATH-MS. *Sci Data*  
733 1: 140031

734 Röst HL, Rosenberger G, Navarro P, Gillet L, Miladinovic SM, Schubert OT, Wolski W, Collins BC,  
735 Malmstrom J, Malmstrom L, Aebersold R (2014) OpenSWATH enables automated, targeted analysis of  
736 data-independent acquisition MS data. *Nat Biotechnol* 32: 219-23  
737 Russnes HG, Navin N, Hicks J, Borresen-Dale AL (2011) Insight into the heterogeneity of breast cancer  
738 through next-generation sequencing. *J Clin Invest* 121: 3810-8  
739 Schubert OT, Gillet LC, Collins BC, Navarro P, Rosenberger G, Wolski WE, Lam H, Amodei D, Mallick P,  
740 MacLean B, Aebersold R (2015) Building high-quality assay libraries for targeted analysis of SWATH MS  
741 data. *Nat Protoc* 10: 426-41  
742 Shah RB, Bentley J, Jeffery Z, DeMarzo AM (2015) Heterogeneity of PTEN and ERG expression in prostate  
743 cancer on core needle biopsies: implications for cancer risk stratification and biomarker sampling. *Hum*  
744 *Pathol* 46: 698-706  
745 Sturm M, Bertsch A, Gropf C, Hildebrandt A, Hussong R, Lange E, Pfeifer N, Schulz-Trieglaff O, Zerck A,  
746 Reinert K, Kohlbacher O (2008) OpenMS - an open-source software framework for mass spectrometry.  
747 *BMC Bioinformatics* 9: 163  
748 Tukey JW (1977) *Exploratory Data Analysis*. Addison-Wesley. ISBN 0-201-07616-0. OCLC 3058187  
749 Tuxhorn JA, Ayala GE, Smith MJ, Smith VC, Dang TD, Rowley DR (2002) Reactive stroma in human  
750 prostate cancer: induction of myofibroblast phenotype and extracellular matrix remodeling. *Clin Cancer*  
751 *Res* 8: 2912-23  
752 Uhlen M, Fagerberg L, Hallstrom BM, Lindskog C, Oksvold P, Mardinoglu A, Sivertsson A, Kampf C,  
753 Sjostedt E, Asplund A, Olsson I, Edlund K, Lundberg E, Navani S, Szigartyo CA, Odeberg J, Djureinovic D,  
754 Takanen JO, Hober S, Alm T et al. (2015) Proteomics. Tissue-based map of the human proteome. *Science*  
755 347: 1260419  
756 Umbehr M, Kessler TM, Sulser T, Kristiansen G, Probst N, Steurer J, Bachmann LM (2008) ProCOC: the  
757 prostate cancer outcomes cohort study. *BMC Urol* 8: 9  
758 Vanhara P, Hampl A, Kozubik A, Soucek K (2012) Growth/differentiation factor-15: prostate cancer  
759 suppressor or promoter? *Prostate Cancer Prostatic Dis* 15: 320-8  
760 Wettstein MS, Saba K, Umbehr MH, Murtola TJ, Fankhauser CD, Adank JP, Hofmann M, Sulser T,  
761 Hermanns T, Moch H, Wild P, Poyet C (2017) Prognostic Role of Preoperative Serum Lipid Levels in  
762 Patients Undergoing Radical Prostatectomy for Clinically Localized Prostate Cancer. *Prostate* 77: 549-556  
763 Wisniewski JR, Ostasiewicz P, Dus K, Zielinska DF, Gnad F, Mann M (2012) Extensive quantitative  
764 remodeling of the proteome between normal colon tissue and adenocarcinoma. *Mol Syst Biol* 8: 611  
765 Yachida S, Jones S, Bozic I, Antal T, Leary R, Fu B, Kamiyama M, Hruban RH, Eshleman JR, Nowak MA,  
766 Velculescu VE, Kinzler KW, Vogelstein B, Iacobuzio-Donahue CA (2010) Distant metastasis occurs late  
767 during the genetic evolution of pancreatic cancer. *Nature* 467: 1114-7  
768 Zellweger T, Gunther S, Zlobec I, Savic S, Sauter G, Moch H, Mattarelli G, Eichenberger T, Curschellas E,  
769 Rufenacht H, Bachmann A, Gasser TC, Mihatsch MJ, Bubendorf L (2009) Tumour growth fraction  
770 measured by immunohistochemical staining of Ki67 is an independent prognostic factor in preoperative  
771 prostate biopsies with small-volume or low-grade prostate cancer. *Int J Cancer* 124: 2116-23  
772 Zhang B, Wang J, Wang X, Zhu J, Liu Q, Shi Z, Chambers MC, Zimmerman LJ, Shaddox KF, Kim S, Davies  
773 SR, Wang S, Wang P, Kinsinger CR, Rivers RC, Rodriguez H, Townsend RR, Ellis MJ, Carr SA, Tabb DL et al.  
774 (2014) Proteogenomic characterization of human colon and rectal cancer. *Nature* 513: 382-7  
775 Zhang H, Liu T, Zhang Z, Payne SH, Zhang B, McDermott JE, Zhou JY, Petyuk VA, Chen L, Ray D, Sun S,  
776 Yang F, Chen L, Wang J, Shah P, Cha SW, Aiyetan P, Woo S, Tian Y, Gritsenko MA et al. (2016) Integrated  
777 Proteogenomic Characterization of Human High-Grade Serous Ovarian Cancer. *Cell* 166: 755-65

778

779 **FIGURE LEGENDS**

780 **Figure 1. Study design.** (A) H&E staining of the fresh frozen prostate tissue from three individuals who  
781 have contributed BPH (non-tumorous) and matching acinar or ductal adenocarcinoma. Green, orange, and  
782 blue lines depict regions diagnosed by a pathologist as BPH, acinar and ductal tumors, respectively. Black  
783 circles indicate where the punches were made. (B) Overall measured variation of protein expression was  
784 partitioned into biological and technical variation including inter-patient variation, inter-tissue variation,  
785 intra-tissue variation and technical variation from MS analysis and batch variation. Three or six punches  
786 were sampled from each tissue type, followed by PCT-SWATH analyses in technical duplicate. The  
787 samples were shuffled and analyzed in 10 batches of six samples.

788  
789 **Figure 2. Consistency of technical and total variance.** (A) Correlation of technical variances estimated  
790 independently for different samples. Technical variance is estimated from technical replicates. (B)  
791 Correlation of total variances (between punches) estimated independently from punches from different  
792 tissue samples (different patients, different tissue types).

793  
794 **Figure 3. Correlation of biological variance between patients and tissue types.** Each dot represents  
795 one protein. (A) Distributions of biological variance estimates. Inter-patient variances and inter-tissue  
796 variances are based on averaging the measurements of at least three punches. Intra-tissue variance was  
797 first determined independently per patient and tissue type, and then averaged. (B) Biological variance  
798 between tissue of the same patient versus variance between punches of the same patient and tissue. (C)  
799 Biological variance between different patients but same tissue type versus variance between punches of  
800 the same patient and tissue. (D) Biological variance between the same tissue types in different patients  
801 versus variance between different tissue types of the same patient.

802  
803 **Figure 4. Intra-tissue heterogeneity in tumorous and non-tumorous tissue.** (A) Biological variance  
804 among punches from the same tissue region was considered as the degree of intra-tissue heterogeneity for  
805 the respective tissue type. Degree of intra-tissue heterogeneity for each protein in benign versus malignant  
806 tissue are shown and colored according to classification. (B) GO enrichment analysis of four protein  
807 categories from (A). Length of horizontal bars indicates the significance of the enrichment. (C) Intra-  
808 tissue heterogeneity of biochemical pathways. Each triangle is the average biological variance (intra-  
809 tissue heterogeneity) of all quantified proteins from the respective pathway. Degree of intra-tissue  
810 heterogeneity for each pathway in benign versus malignant tissue are shown. Pathways were grouped  
811 according to their variability in benign and malignant tissue.

812



813 **Figure 5. Immunohistochemical validation of representative proteins.** The top proteins from four ITH  
814 groups in BPH and malignant (ADCA) prostate tissue were validated using a TMA with two  
815 representative tissue spots of each patient.

816

817 **Figure 6. Correlation between mass spectrometry-based (MS) variance estimates and TMA**  
818 **homogeneity.** *A* shows benign tissues while *B* depicts tumor tissues. The concentrations of CRAT and  
819 NUP93 were almost zero in the benign tissue samples. Thus, it is virtually impossible to estimate their  
820 intra-tissue variation in benign tissues. The correlation between MS-based variance and TMA  
821 homogeneity was however computed without excluding these two proteins. NUP93 was slightly off the  
822 regression curve because its signal in IHC was relatively weak.

823 **SUPPLEMENTARY FIGURES**

824 **Supplemental Figure 1. Benign and malignant prostate tissue from three individuals.** H&E staining  
825 of the fresh frozen prostate tissue used in this study. Amplified views of representative region in each area  
826 were shown in **B – I** as indicated.

827

828 **Supplementary Figure 2. Unsupervised clustering of 3700 proteins quantified with at least two**  
829 **concordant peptides.**

830

831 **Supplementary Figure 3. Dependence of technical variance on protein intensity.** Proteins are divided  
832 into eight bins with roughly the same number. X-axis shows the mean intensity value of each bin, and Y-  
833 axis shows the log<sub>10</sub> technical variance.

834

835 **Supplementary Figure 4. Density curves of biological variance.** Occasionally, our estimate of the  
836 technical variance was larger than the variation between punches, after technical replicates were averaged  
837 per punch. This resulted in a negative estimate of the biological variance, which is of course infeasible.  
838 We assumed that those proteins have a biological variance close to zero, thus the total variance is mostly  
839 reflecting technical variance. Therefore, we used the distribution of negative scores as a background  
840 distribution (Null distribution) for the Null hypothesis that there is no biological variance between  
841 punches. The blue curve shows the negative part of the distribution mirrored on the positive side. The  
842 distribution of observed biological variance estimates (red) is clearly above that background distribution.

843

844 **Supplementary Figure 5. Staining images of protein expression for the tissue microarray.** Six  
845 proteins (ACPP; ABCF1; NUP93; CUTA; CRAT; FSTL1) were measured using immunohistochemistry  
846 in a TMA containing tissue samples from 83 patients from an independent cohort, including 35 patients  
847 with BPH and 48 patients with prostate ADCA.

848

849 **Supplementary Table 1.** Annotations of the 60 prostate tissue samples used for the PCT-SWATH  
850 analysis.

851 **Supplementary Table 2.** Batch design of the 60 prostate tissue samples in the PCT-SWATH analysis.

852 **Supplementary Table 3.** Peptides identified in the 60 prostate tissue samples.

853 **Supplementary Table 4.** Proteins quantified in the 60 prostate tissue samples.

854 **Supplementary Table 5.** Biological variance of proteins in the 60 prostate tissue samples.

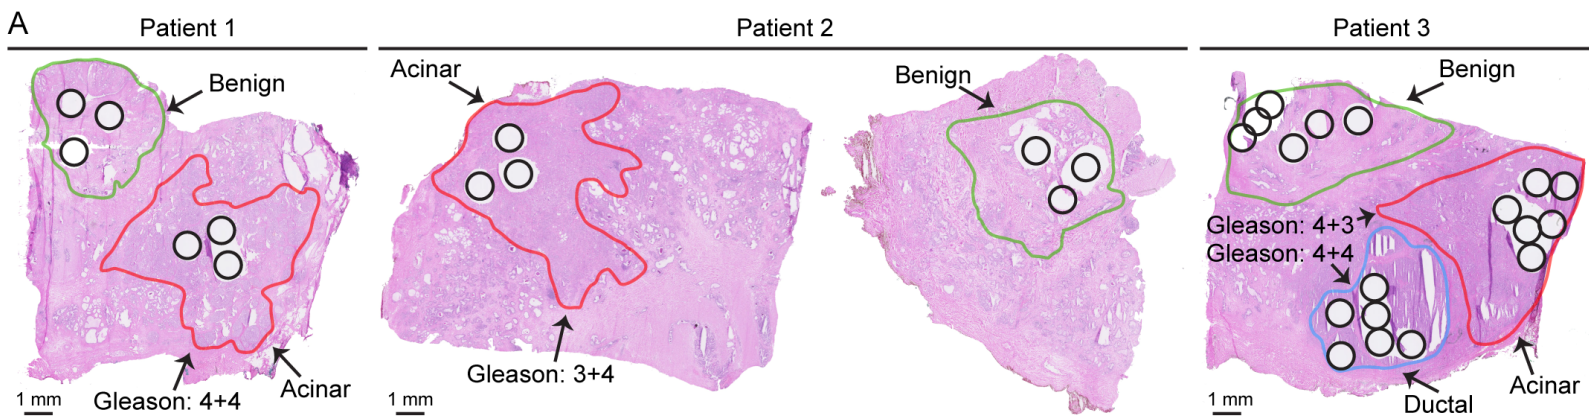

**B**

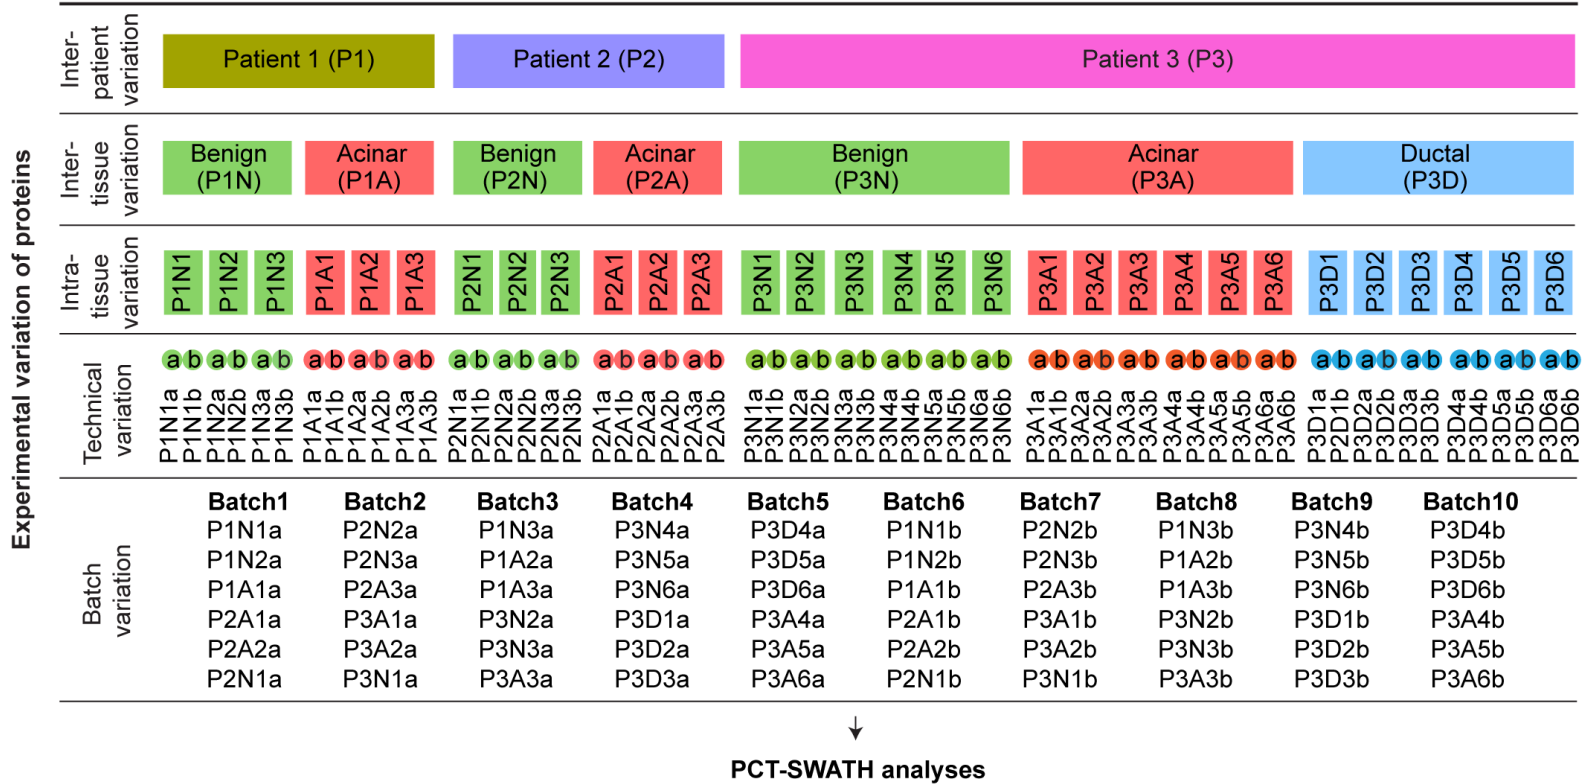

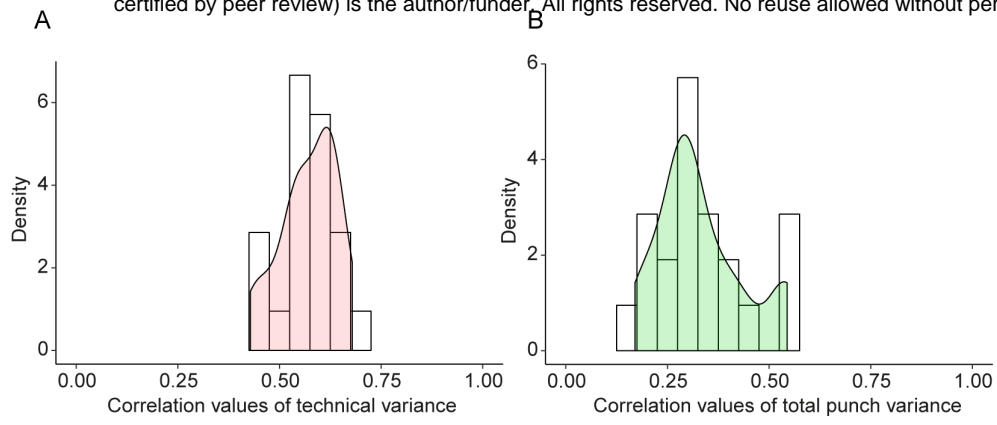

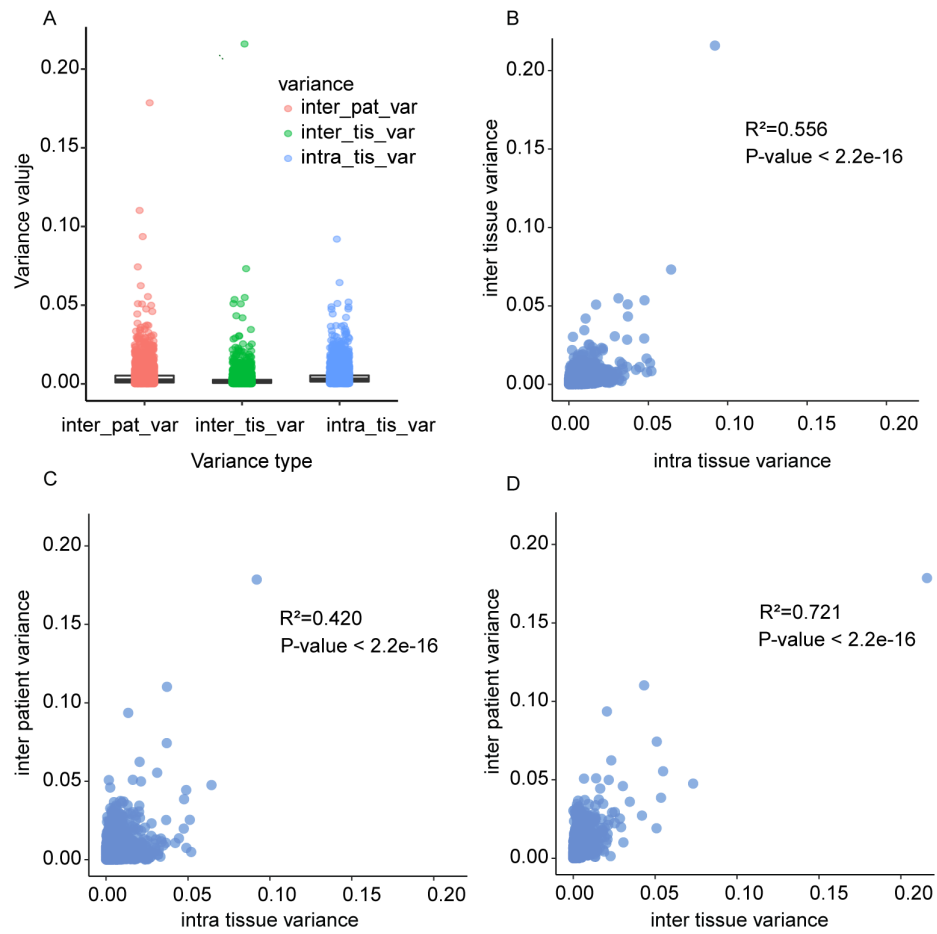

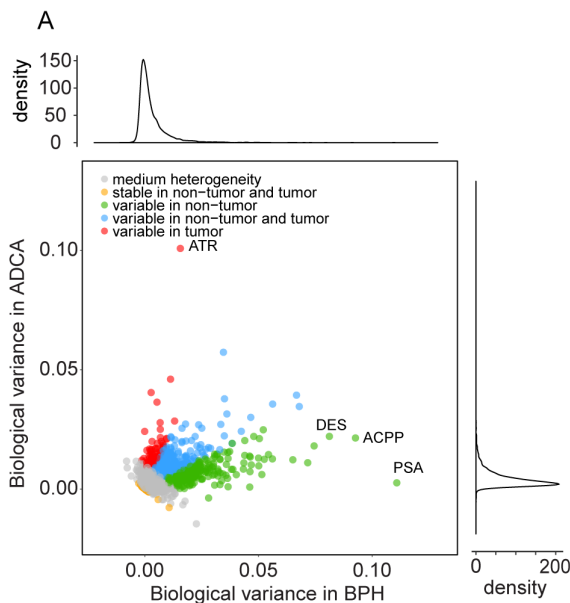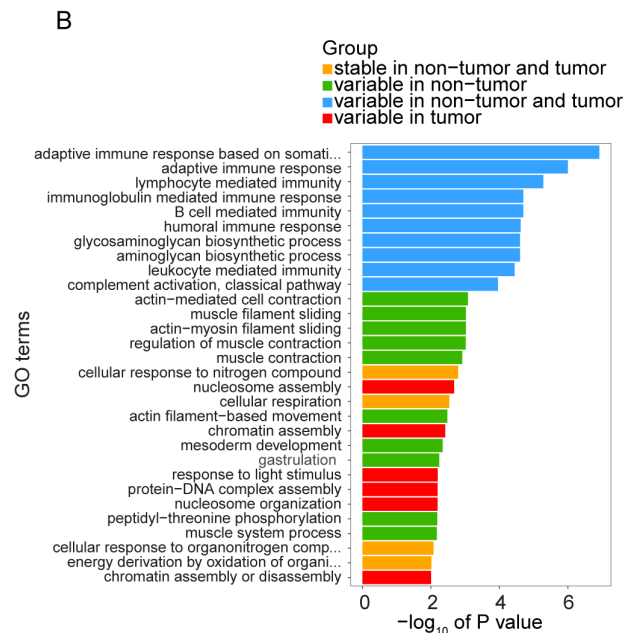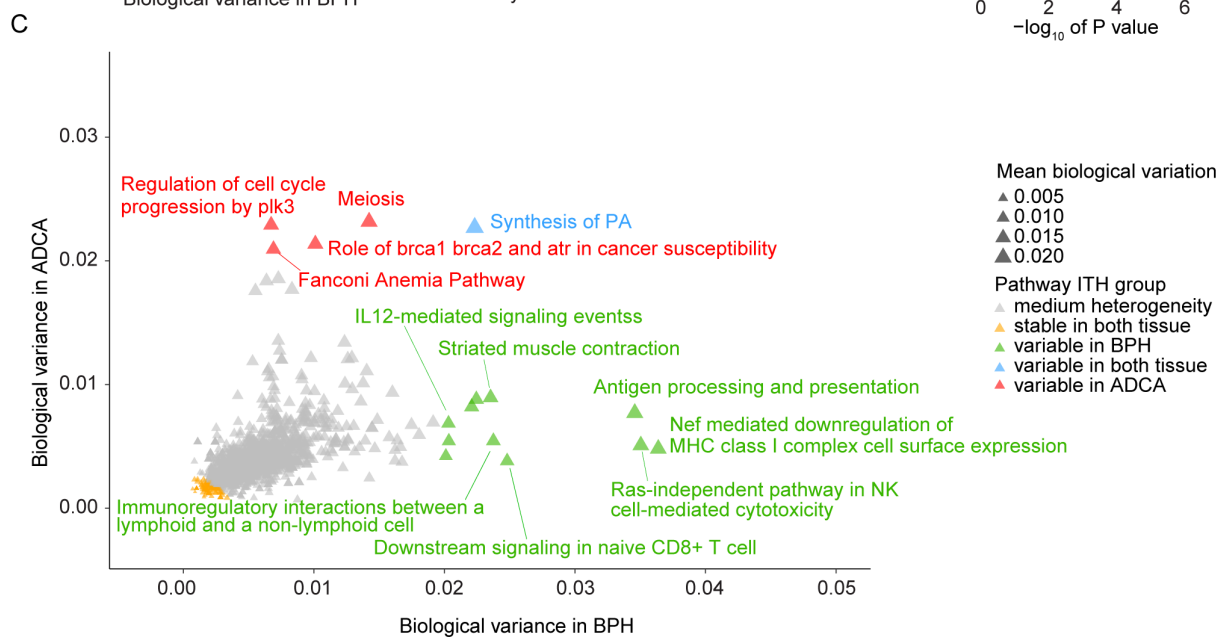

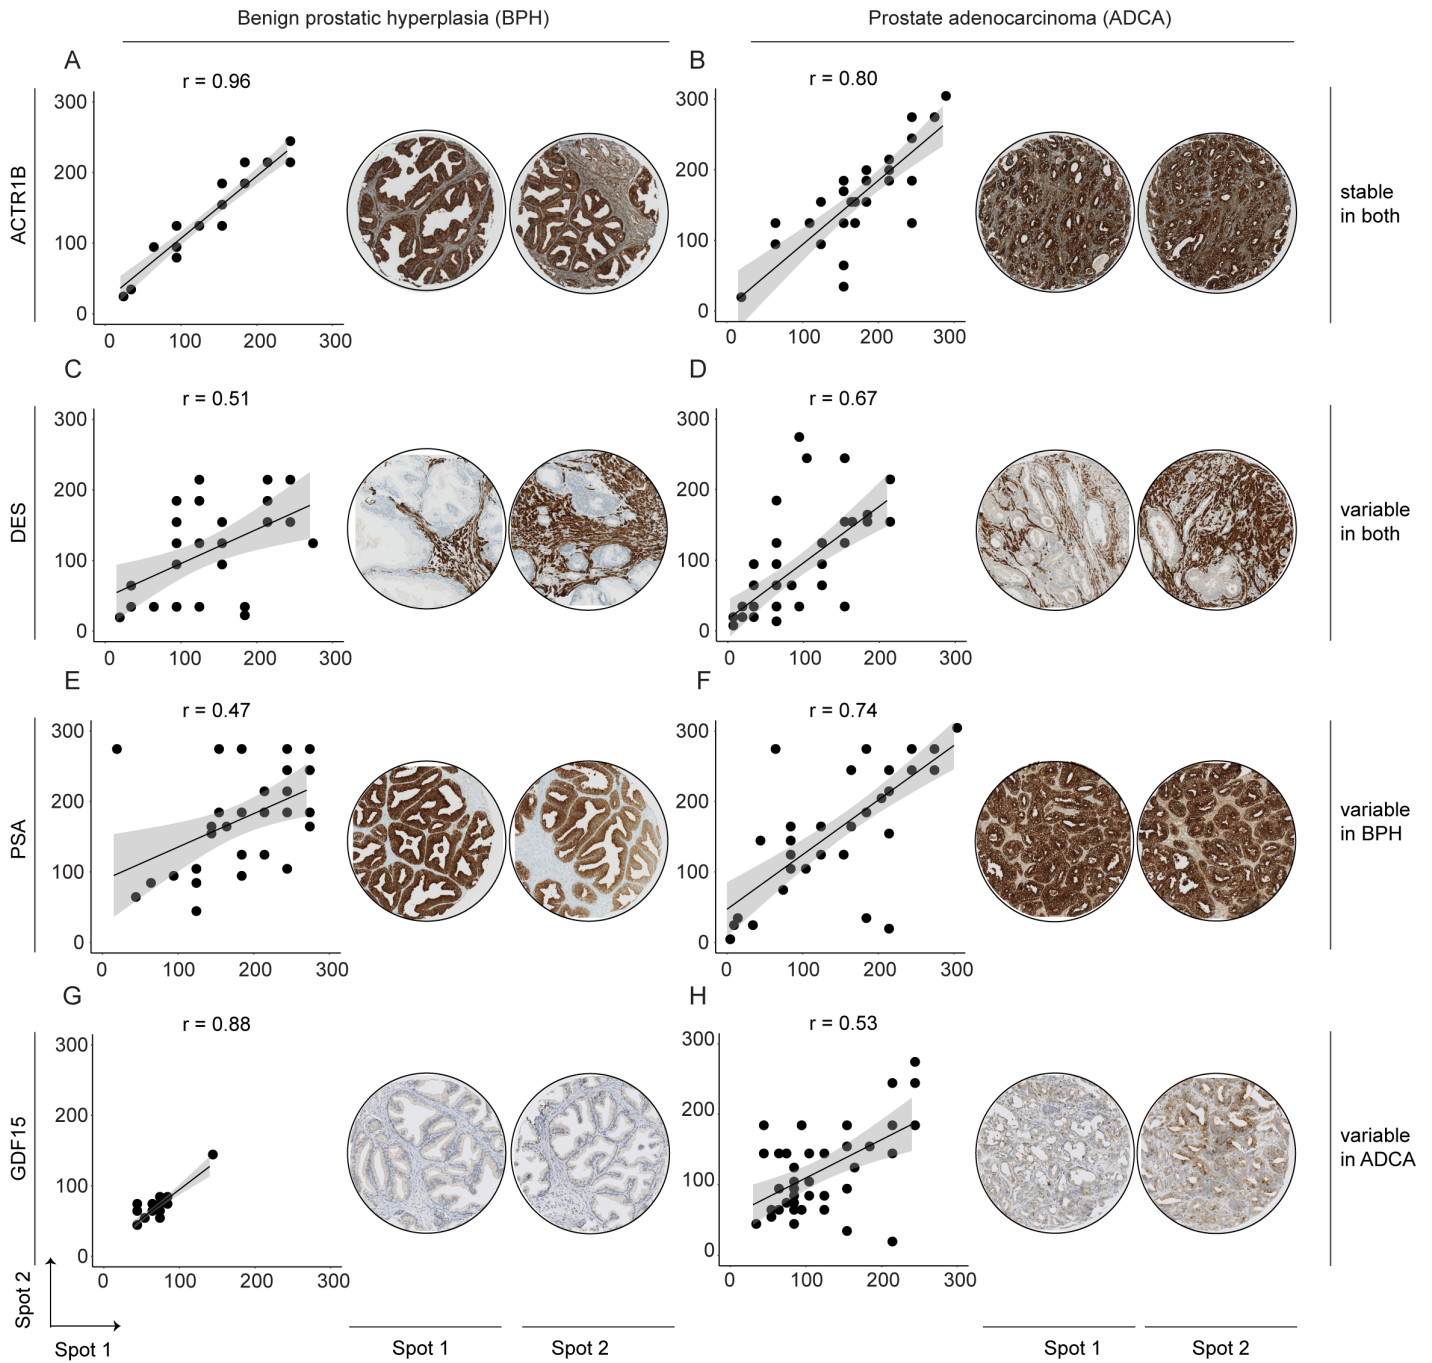

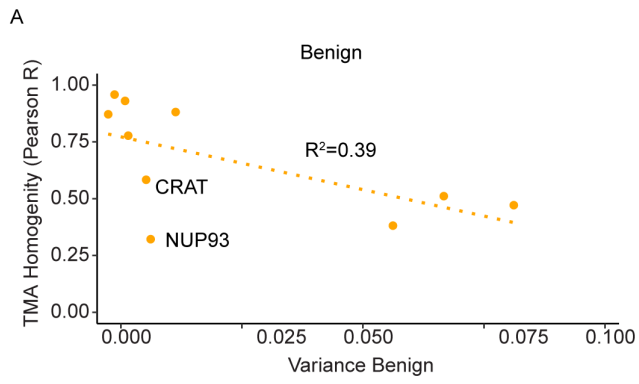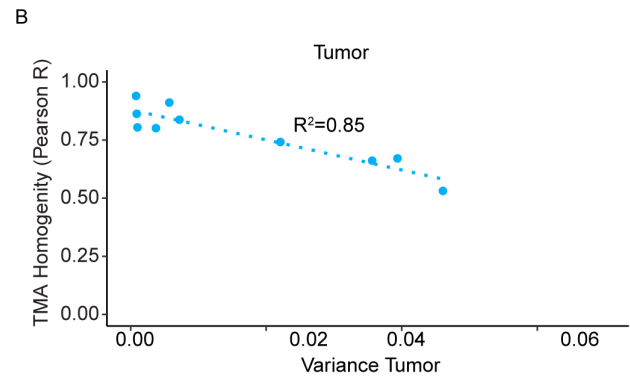



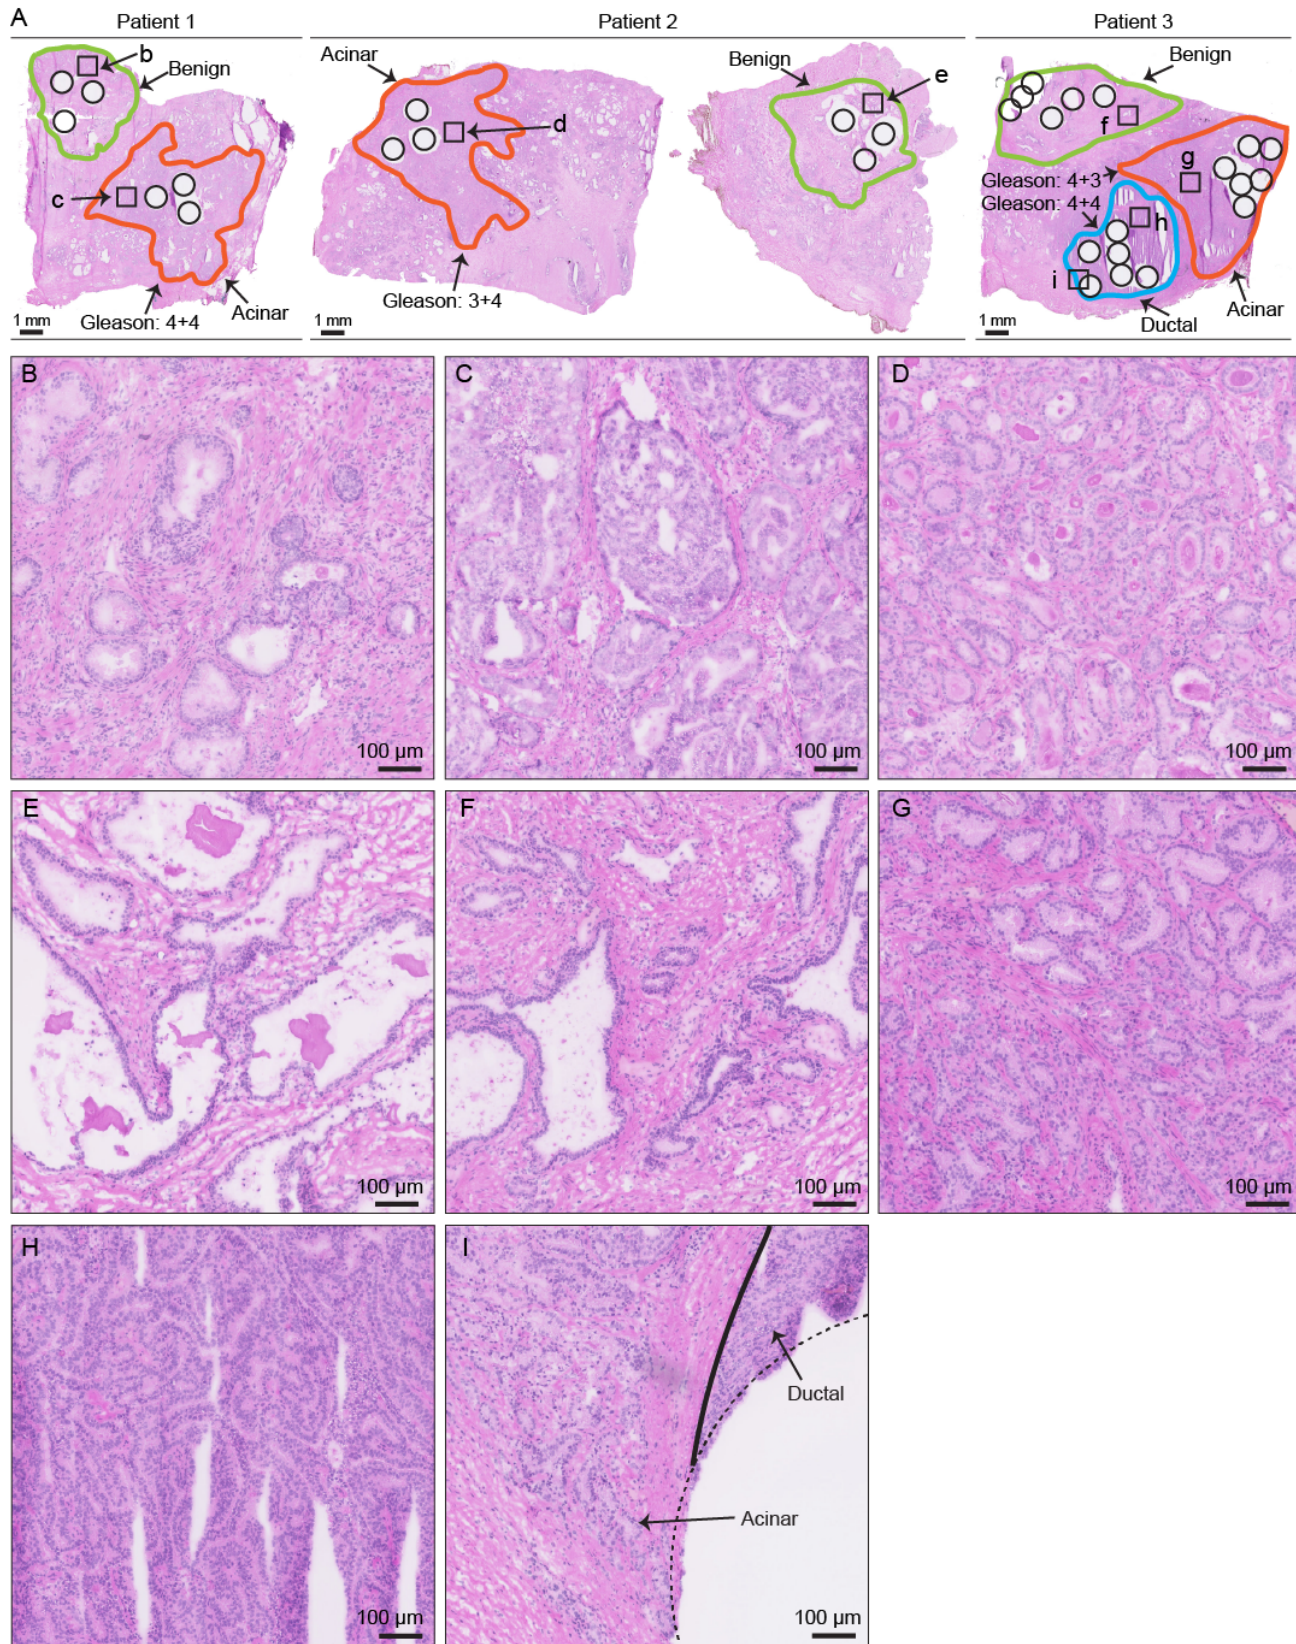

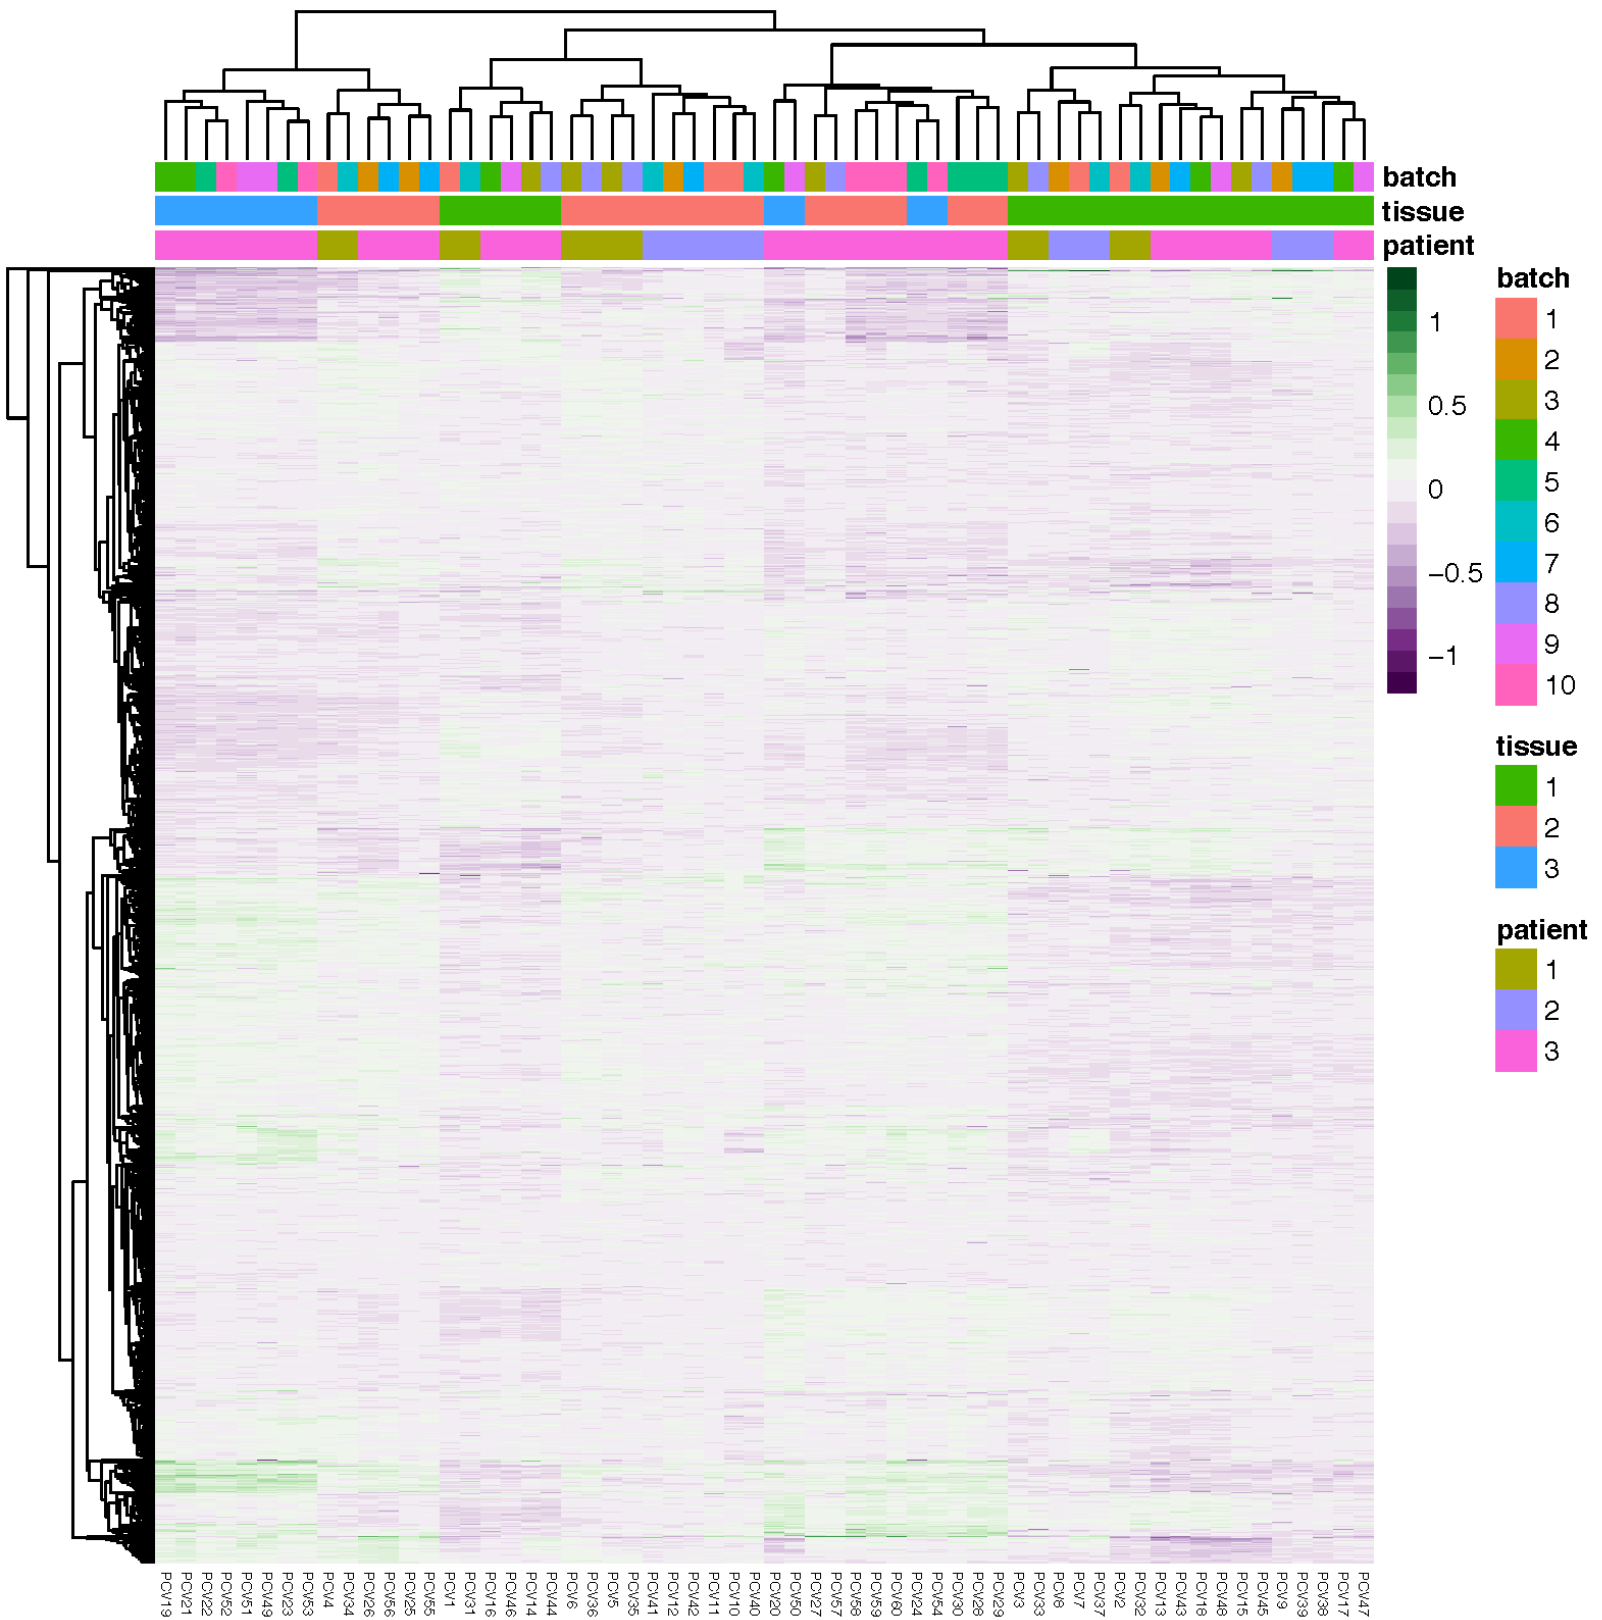

## Technical variance and intensity

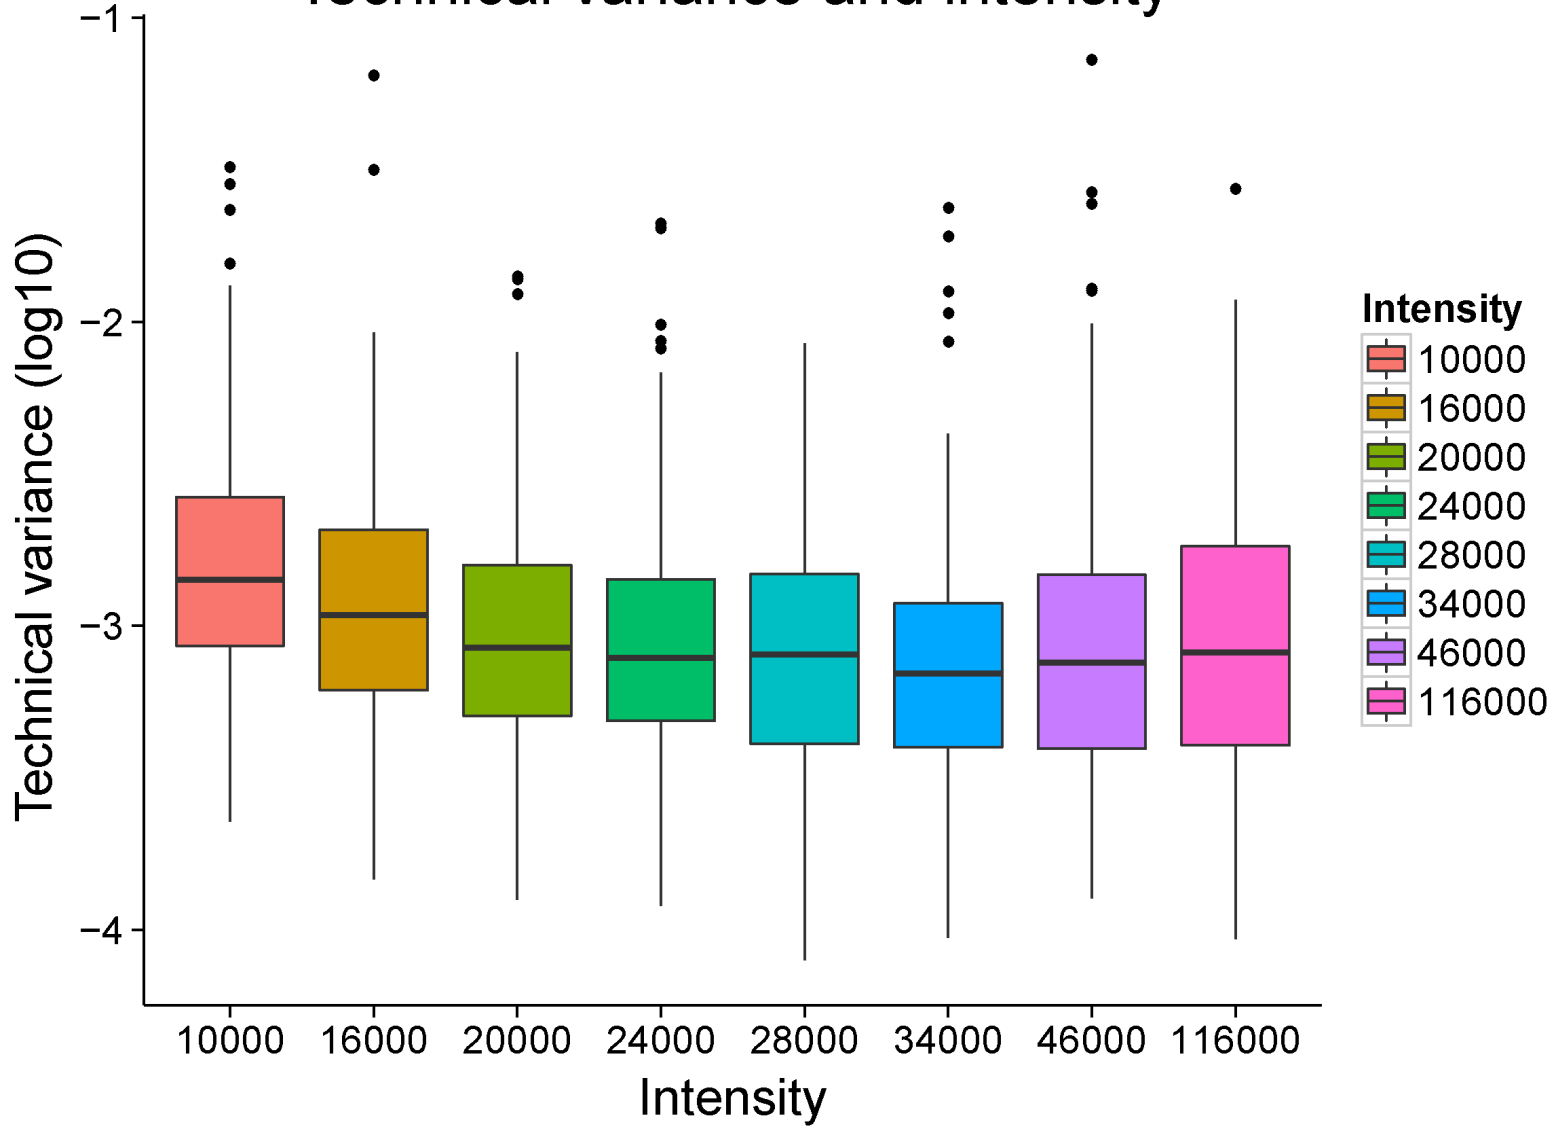

Density curve of biological variance

bioRxiv preprint doi: <https://doi.org/10.1101/250167>; this version posted January 18, 2018. The copyright holder for this preprint (which was not certified by peer review) is the author/funder. All rights reserved. No reuse allowed without permission.

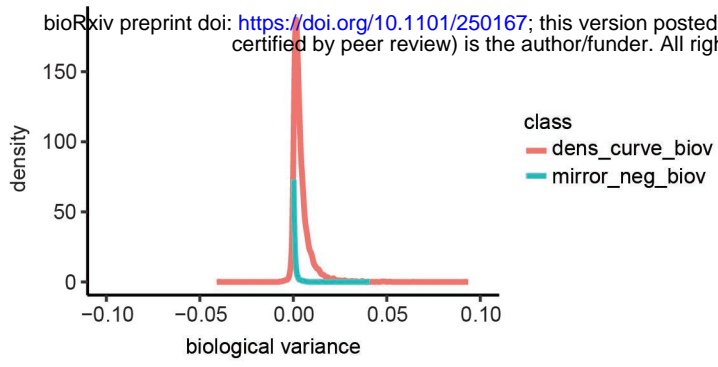

## Benign prostatic hyperplasia (BPH)

## Prostate adenocarcinoma (ADCA)

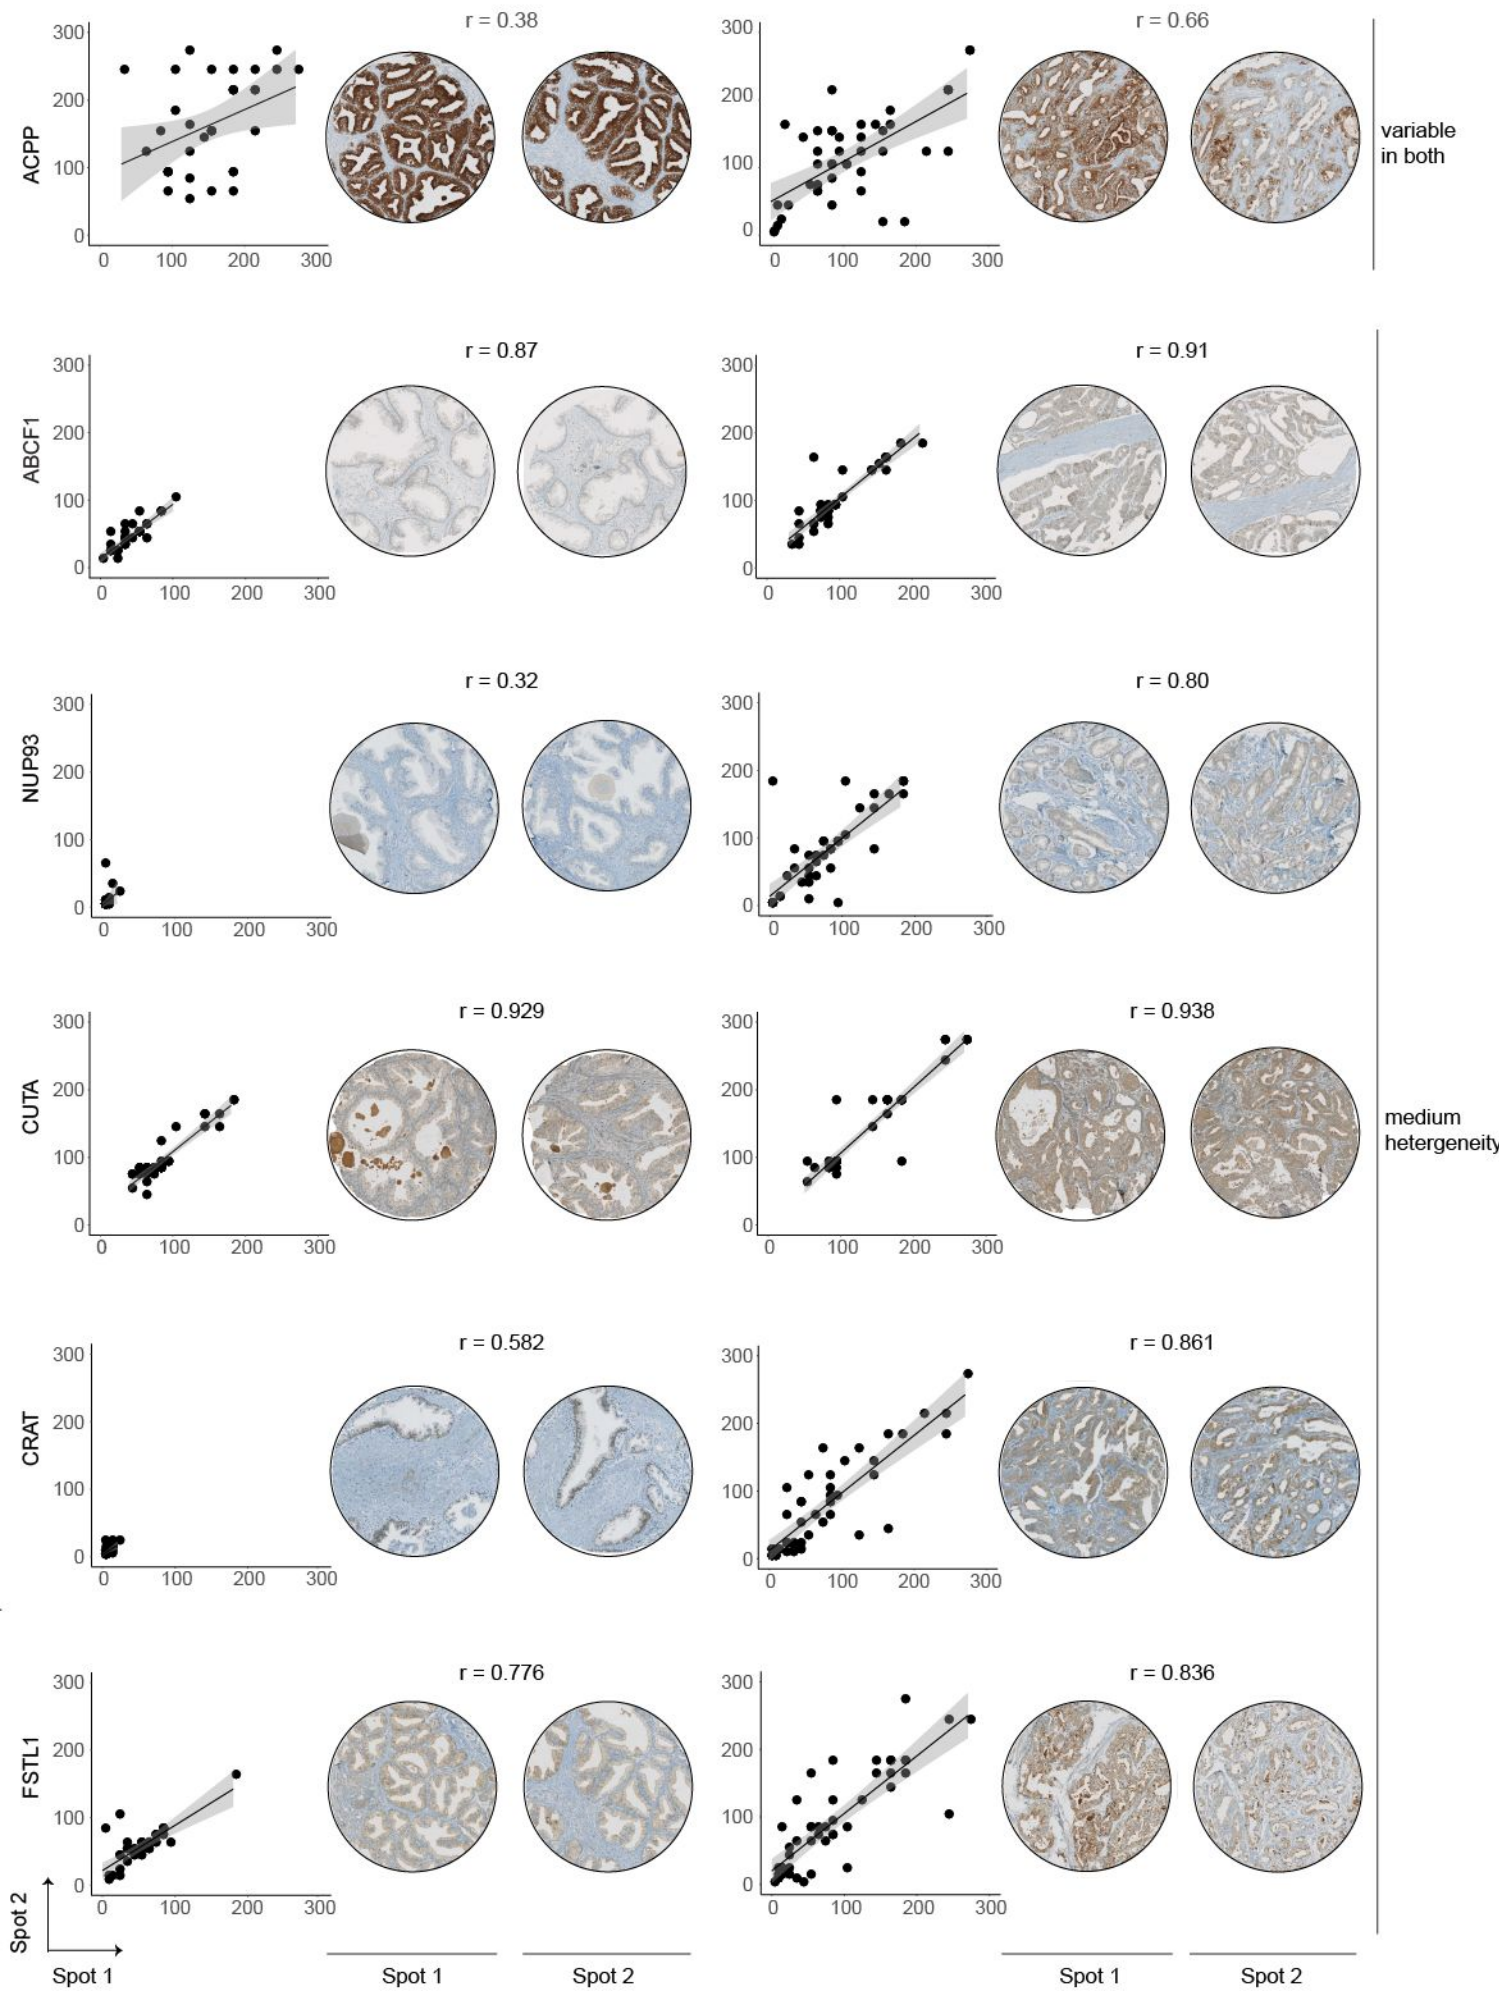

Source: https://www.biorxiv.org/content/10.1101/250167v1.full.pdf
